# Supplementary material for: Leaf nutrient traits exhibit greater environmental plasticity compared to resource utilization traits along an elevational gradient
Source: Front Plant Sci. 2024 Nov 19;15:1484744. doi: 10.3389/fpls.2024.1484744 (PMC11611591; doi:10.3389/fpls.2024.1484744)
Supplement: Supplementary file 2 [file Table1.xlsx]

## Sheet: Sheet1
Forest Original	Forest Type	Longitude	Latitude	Elevation	Species Richness	Forest Age	Average DBH	Forest Density	Forest Slope	Aspect of slope	Soil N	Soil P	Soil pH	MAT	MACT	MAHT	MAP	Annual average sunshine duration	Average annual evaporation	LA	SLA	LDMC	LN	LP	Survey Month	Survey Year	Data Source	References
Natural	Broadleaved	122.344	53.4683	290	7	15	35.7	1267	4	NA	0.6	1.15714	5.89	-5.5	-28.9	13.5	430	2446.4	1287	35.1218	18.266	32.9247	33	1.80664	7	2014	Authors	unpublished
Natural	Broadleaved	122.344	53.4683	290	7	15	37.5	1267	22	NA	0.6	1.15714	5.89	-5.5	-28.9	13.5	430	2446.4	1287	4.115	15.9552	40.5286	19.6	1.22844	7	2014	Authors	unpublished
Natural	Broadleaved	122.344	53.4683	290	7	15	43.8	1267	5	NA	0.6	1.15714	5.89	-5.5	-28.9	13.5	430	2446.4	1287	15.3316	12.3135	41.5033	16.2	1.31562	7	2014	Authors	unpublished
Natural	Broadleaved	122.344	53.4683	290	7	30	38.6	1267	19.5	NA	0.6	1.15714	5.89	-5.5	-28.9	13.5	430	2446.4	1287	8.865	5.23043	43.4045	9.4	1.79718	7	2014	Authors	unpublished
Natural	Broadleaved	122.344	53.4683	290	7	15	35.7	1600	5	NA	0.6	1.15714	5.89	-5.5	-28.9	13.5	430	2446.4	1287	8.169	24.9725	33.1367	22.1	0.884972	7	2014	Authors	unpublished
Natural	Broadleaved	122.344	53.4683	290	7	40	29.9	1600	6	NA	0.6	1.15714	5.89	-5.5	-28.9	13.5	430	2446.4	1287	7.974	23.0991	32.6323	24.5	1.06065	7	2014	Authors	unpublished
Natural	Broadleaved	122.344	53.4683	290	7	5	37.5	1600	10	NA	0.6	1.15714	5.89	-5.5	-28.9	13.5	430	2446.4	1287	6.8	16.6531	38.1131	15.5	0.930759	7	2014	Authors	unpublished
Natural	Broadleaved	122.344	53.4683	290	7	30	43.8	1267	6	NA	0.6	1.15714	5.89	-5.5	-28.9	13.5	430	2446.4	1287	6.56	5.0618	47.7118	8.7	1.71876	7	2014	Authors	unpublished
Natural	Broadleaved	122.344	53.4683	290	7	15	37.5	1600	19.5	NA	0.6	1.15714	5.89	-5.5	-28.9	13.5	430	2446.4	1287	6.25	18.0729	38.4909	18.5	1.02363	7	2014	Authors	unpublished
Natural	Broadleaved	122.344	53.4683	290	7	5	35.7	1267	5	NA	0.6	1.15714	5.89	-5.5	-28.9	13.5	430	2446.4	1287	5.94	16.3416	38.6091	16.4	1.00358	7	2014	Authors	unpublished
Natural	Broadleaved	122.344	53.4683	290	7	20	33.9	1267	4	NA	0.6	1.15714	5.89	-5.5	-28.9	13.5	430	2446.4	1287	5.94	27.8557	31.6162	27.1	0.972871	7	2014	Authors	unpublished
Natural	Broadleaved	122.344	53.4683	290	7	15	32.2	1267	6	NA	0.6	1.15714	5.89	-5.5	-28.9	13.5	430	2446.4	1287	5.757	15.9965	41.3601	18.6	1.16275	7	2014	Authors	unpublished
Natural	Coniferous	106.9	21.8	426	3	130	20.3822	500	32	SW	1.23747	15.7754	4.61358	21.8	8.2	28.9	1475	1300	765	3.54	52	32	13.8	1.4	7	2012	Authors	unpublished
Natural	Broadleaved	122.344	53.4683	290	7	20	33.9	1267	5	NA	0.6	1.15714	5.89	-5.5	-28.9	13.5	430	2446.4	1287	5.54	34.7698	24.602	12	0.345127	7	2014	Authors	unpublished
Natural	Broadleaved	122.344	53.4683	290	7	20	38.6	1267	21	NA	0.6	1.15714	5.89	-5.5	-28.9	13.5	430	2446.4	1287	5.297	5.01557	49.586	11.1	2.21311	7	2014	Authors	unpublished
Natural	Broadleaved	122.344	53.4683	290	7	20	38.6	1267	15	NA	0.6	1.15714	5.89	-5.5	-28.9	13.5	430	2446.4	1287	5.059	29.8627	29.0609	17.3	0.579317	7	2014	Authors	unpublished
Natural	Coniferous	109.1	23.05	378	3	120	16.4013	500	32	SE	1.34455	15.3488	4.59817	21.5	7.8	28.2	1477.8	1300	725	22.5	10.02	40.73	10.92	1.02	7	2013	Authors	unpublished
Natural	Broadleaved	121.69	49.477	920	1	10	18.8	2000	25	ES	1.23126	20	8.2	1.3	-10.5	14.3	378.5	2550	1456	4.341	15.1609	37.08	21.9172	2.575	7	2018	Authors	unpublished
Natural	Broadleaved	126.257	48.79	400	2	50	28.5	1267	18	S	2.93669	5.552	6.47931	-0.5	-21.3	19.8	476.33	2472.2	782.3	4.3	11.3	41.3	25.7	2.3	7	2016	Literatures	Huang et al. (2021)
Natural	Broadleaved	126.257	48.79	400	2	52	28.5	1267	18	N	2.93669	5.552	6.47931	-0.5	-21.3	19.8	476.33	2472.2	782.3	4.25	11.5	38	25.1	2.5	7	2016	Literatures	Huang et al. (2021)
Natural	Broadleaved	126.04	48.745	415	2	36	33.9	1267	19.5	S	2.93577	5.55409	6.49114	-0.5	-21.3	19.8	476.33	2474.58	782.3	4.2	11.2	37.5	27.8	2.8	7	2016	Literatures	Huang et al. (2021)
Natural	Broadleaved	126.04	48.745	415	2	37	35.7	1267	19.5	N	2.93577	5.55409	6.49114	-0.5	-21.3	19.8	476.33	2474.58	782.3	4.2	11.1	36.1	24.7	2.5	7	2016	Literatures	Huang et al. (2021)
Natural	Broadleaved	126.4	48.72	500	2	59	29	1267	19.5	S	3.01276	5.47858	6.46605	-0.5	-21.3	19.8	476.33	2471.5	782.3	4.154	19.8	36.3	21.2	1.6	7	2016	Literatures	Huang et al. (2021)
Natural	Broadleaved	126.4	48.72	500	2	50	29	2000	10	N	3.01276	5.47858	6.46605	-0.5	-21.3	19.8	476.33	2471.5	782.3	4.136	18.3	36.1	28.9	2.4	7	2016	Literatures	Huang et al. (2021)
Natural	Broadleaved	126.118	48.708	340	2	21	29.9	1267	19.5	S	2.88484	5.64314	6.47597	-0.5	-21.3	19.8	476.33	2467.77	782.3	4.107	11.3	42.1	15.2	2.5	7	2016	Literatures	Huang et al. (2021)
Natural	Broadleaved	126.118	48.708	340	2	25	30.4	2000	12	N	2.88484	5.64314	6.47597	-0.5	-21.3	19.8	476.33	2467.77	782.3	4.1	14.1	37.8	16.1	0.95	7	2016	Literatures	Huang et al. (2021)
Natural	Broadleaved	126.368	48.679	380	2	49	29.9	1267	18	S	2.92438	5.61415	6.45592	-0.5	-21.3	19.8	476.33	2464.14	782.3	4.088	12.1	38.6	19.5	2.3	7	2016	Literatures	Huang et al. (2021)
Natural	Broadleaved	126.368	48.679	380	2	51	29.9	2000	19.5	N	2.92438	5.61415	6.45592	-0.5	-21.3	19.8	476.33	2464.14	782.3	4.057	12	35.2	26.8	2.7	7	2016	Literatures	Huang et al. (2021)
Natural	Broadleaved	126.275	48.6536	340	2	55	30.3	1267	19.5	S	2.89067	5.6638	6.45733	-0.5	-21.3	19.8	476.33	2462.55	782.3	4.051	12.2	42.2	17.4	2.1	7	2016	Literatures	Huang et al. (2021)
Natural	Broadleaved	126.275	48.6536	340	2	59	30.3	2000	18	N	2.89067	5.6638	6.45733	-0.5	-21.3	19.8	476.33	2462.55	782.3	3.941	10.8	41.1	28.5	2.5	7	2016	Literatures	Huang et al. (2021)
Natural	Broadleaved	129.3	46.6	330	10	80	29	1267	6	S	0.9	0.357143	6.5	2	-18	27	600	2670	1250	3.91	26	30	15	2.9	8	2016	Literatures	Zhang et al. (2019)
Natural	Broadleaved	129.3	46.6	330	10	80	29	1600	6	S	0.8	0.314286	6.6	2	-18	27	600	2670	1250	3.844	26	30	28	2.2	8	2016	Literatures	Zhang et al. (2019)
Natural	Broadleaved	129.3	46.6	373	10	80	29	1267	15	S	0.85	0.3	6.4	2	-18	27	600	2670	1250	3.835	26	30	39	1.9	8	2016	Literatures	Zhang et al. (2019)
Natural	Broadleaved	127.73	43.95	475	8	75	29.6	1267	4	NA	2.91653	7.31499	5.77401	3.8	-18.6	21.7	750	2225.47	435	3.803	16.75	41.18	21.14	1.45	7	2012	Literatures	Lian et al. (2019)
Natural	Coniferous	127.73	43.95	475	8	80	29.9	1267	10	NA	2.91653	7.31499	5.77401	3.8	-18.6	21.7	750	2225.47	435	3.8	8.8	43.32	23.44	1.55	7	2012	Literatures	Lian et al. (2019)
Natural	Broadleaved	127.73	43.95	475	8	60	30.3	1267	5	NA	2.91653	7.31499	5.77401	3.8	-18.6	21.7	750	2225.47	435	3.8	11.35	41.82	23.35	1.44	7	2012	Literatures	Lian et al. (2019)
Natural	Coniferous	127.73	43.95	475	8	120	33.9	1267	12	NA	2.91653	7.31499	5.77401	3.8	-18.6	21.7	750	2225.47	435	3.796	76.12	44.09	25.06	1.68	7	2012	Literatures	Lian et al. (2019)
Natural	Coniferous	127.73	43.95	475	8	120	32.2	1267	22	NA	2.91653	7.31499	5.77401	3.8	-18.6	21.7	750	2225.47	435	3.792	4.81	45.18	13.62	1.23	7	2012	Literatures	Lian et al. (2019)
Natural	Coniferous	127.73	43.95	475	8	200	28.5	1267	25	NA	2.91653	7.31499	5.77401	3.8	-18.6	21.7	750	2225.47	435	3.682	7.69	43.43	21.11	1.6	7	2012	Literatures	Lian et al. (2019)
Natural	Broadleaved	127.73	43.95	475	8	75	30.4	1267	12	NA	2.91653	7.31499	5.77401	3.8	-18.6	21.7	750	2225.47	435	3.62	18.763	48.22	31.15	1.85	7	2012	Literatures	Lian et al. (2019)
Natural	Coniferous	127.73	43.95	475	8	130	29.6	1267	24	NA	2.91653	7.31499	5.77401	3.8	-18.6	21.7	750	2225.47	435	3.569	20.81	40.59	24.2	1.53	7	2012	Literatures	Lian et al. (2019)
Natural	Broadleaved	127.73	43.95	475	8	30	29.9	1267	12	NA	2.91653	7.31499	5.77401	3.8	-18.6	21.7	750	2225.47	435	3.53	9.6	41.96	26.99	1.7	7	2012	Literatures	Lian et al. (2019)
Natural	Broadleaved	127.73	43.95	475	8	75	30.3	1267	18	NA	2.91653	7.31499	5.77401	3.8	-18.6	21.7	750	2225.47	435	3.523	12.9	41.64	22.81	1.4	7	2012	Literatures	Lian et al. (2019)
Natural	Coniferous	127.73	43.95	475	8	150	33.9	1267	24	NA	2.91653	7.31499	5.77401	3.8	-18.6	21.7	750	2225.47	435	3.52	83.17	44.04	23.06	1.32	7	2012	Literatures	Lian et al. (2019)
Natural	Coniferous	127.73	43.95	475	8	80	32.2	1267	18	NA	2.91653	7.31499	5.77401	3.8	-18.6	21.7	750	2225.47	435	3.506	5.33	44.85	14.41	1.3	7	2012	Literatures	Lian et al. (2019)
Natural	Coniferous	127.73	43.95	475	8	120	28.5	1267	25	NA	2.91653	7.31499	5.77401	3.8	-18.6	21.7	750	2225.47	435	3.502	10.11	39.52	23.18	1.71	7	2012	Literatures	Lian et al. (2019)
Natural	Coniferous	127.73	43.95	475	8	150	30.4	1267	24	NA	2.91653	7.31499	5.77401	3.8	-18.6	21.7	750	2225.47	435	3.497	17.35	42.81	32.39	1.89	7	2012	Literatures	Lian et al. (2019)
Natural	Coniferous	117.401	23.474	5	3	120	12.3	1575	5	NA	1.48438	15.5607	3.99748	20.8	6.9	32.5	1945	1425.95	1056	2.8	10.44	32.1	14.93	1.05536	7	2013	Literatures	Lian et al. (2019)
Natural	Broadleaved	127.73	43.95	475	8	75	29.6	1600	12	NA	2.91653	7.31499	5.77401	3.8	-18.6	21.7	750	2225.47	435	3.42	21.95	38.56	27.25	1.46	7	2012	Literatures	Lian et al. (2019)
Natural	Coniferous	127.73	43.95	475	8	120	29.9	1267	4	NA	2.91653	7.31499	5.77401	3.8	-18.6	21.7	750	2225.47	435	3.413	10.4	38.17	29.67	1.76	7	2012	Literatures	Lian et al. (2019)
Natural	Coniferous	127.73	43.95	475	8	130	30.3	1267	24	NA	2.91653	7.31499	5.77401	3.8	-18.6	21.7	750	2225.47	435	3.411	13.79	38.86	22.97	1.48	7	2012	Literatures	Lian et al. (2019)
Natural	Broadleaved	127.73	43.95	475	8	75	33.9	1267	18	NA	2.91653	7.31499	5.77401	3.8	-18.6	21.7	750	2225.47	435	3.41	9.31	41.78	23.39	1.44	7	2012	Literatures	Lian et al. (2019)
Natural	Broadleaved	127.73	43.95	475	8	75	32.2	1600	19.5	NA	2.91653	7.31499	5.77401	3.8	-18.6	21.7	750	2225.47	435	3.401	6.69	41.7	14.55	1.37	7	2012	Literatures	Lian et al. (2019)
Natural	Coniferous	127.73	43.95	475	8	120	28.5	1267	4	NA	2.91653	7.31499	5.77401	3.8	-18.6	21.7	750	2225.47	435	3.395	11.61	37.16	24.87	2.04	7	2012	Literatures	Lian et al. (2019)
Natural	Coniferous	127.73	43.95	475	8	130	30.4	1267	24	NA	2.91653	7.31499	5.77401	3.8	-18.6	21.7	750	2225.47	435	3.388	23.39	42.14	33.23	1.92	7	2012	Literatures	Lian et al. (2019)
Natural	Coniferous	108.3	25.1	315	30	25	5.53	500	33	SE	1.32245	14.6333	4.90831	19.8	8.2	28.9	1402	1300	705	18.7	6.8	41.2	20.4	0.68	7	2017	Literatures	Huang et al. (2017)
Natural	Coniferous	108.3	25.1	315	20	15	16.35	500	32	SE	1.32245	14.6333	4.90831	19.8	8.2	28.9	1402	1300	705	15.7	9	42.4	15.7	0.54	7	2017	Literatures	Huang et al. (2017)
Natural	Coniferous	108.3	25.1	315	20	15	14.6497	500	42	SE	1.32245	14.6333	4.90831	19.8	8.2	28.9	1402	1300	705	14.8	12	45.2	16.2	0.7	7	2017	Literatures	Huang et al. (2017)
Planted	Coniferous	119.7	25.5	95.2	1	47	6.2	450	19.5	NA	2	3	5	19.4	11	28	1500	1919.7	1917.4	3.384	11.5	32.1804	15.4698	2.29692	7	2016	Authors	unpublished
Natural	Coniferous	119.7	25.5	31	30	25	14.79	450	12	NA	2.8	1.28571	5.4	19.4	11	28	1500	1919.7	1917.4	3.3	6	41.8	17.9	0.61	7	2017	Authors	unpublished
Planted	Coniferous	119.7	25.5	31	1	47	13.34	450	12	NA	2.8	1.28571	5.4	19.4	11	28	1500	1919.7	1917.4	3.299	51.2963	29.3478	12.292	1.59868	7	2017	Authors	unpublished
Planted	Coniferous	119.7	25.5	95.2	1	47	14.79	450	19.5	NA	2	3	5	19.4	11	28	1500	1919.7	1917.4	3.25	84.0794	24.0458	14.634	1.63705	7	2017	Authors	unpublished
Planted	Coniferous	119.7	25.5	31	1	47	13.34	450	12	NA	2.8	1.28571	5.4	19.4	11	28	1500	1919.7	1917.4	3.183	64.859	27.3684	13.039	1.87228	7	2017	Authors	unpublished
Planted	Coniferous	119.7	25.5	95.2	1	47	11.5	450	19.5	NA	2	3	5	19.4	11	28	1500	1919.7	1917.4	3.053	77.5893	28	11.083	1.62259	7	2017	Authors	unpublished
Natural	Coniferous	119.7	25.5	31	20	15	6.2	450	12	NA	2.8	1.28571	5.4	19.4	11	28	1500	1919.7	1917.4	16.26	9.5	40.6	17.3	0.52	7	2017	Authors	unpublished
Natural	Broadleaved	128.1	42.4	903	3	30	29.9	720	10	EN	3.24624	12.1286	5.96	3.3	-16.5	20.5	750	2200	1200	3.13	30	52	22.4	1.8	7	2012	Authors	unpublished
Natural	Broadleaved	128.1	42.4	761	5	70	30.3	450	4	S	3.24624	12.1286	5.96	3.3	-16.5	20.5	750	2200	1200	3.127	39	10.8	19.4	1.41	7	2012	Authors	unpublished
Planted	Coniferous	106.2	27.2	979	1	47	12.37	1500	35	SW	0.69	1.9	4.46	13.8	3.7	21.2	1050	1345	766.1	12.3	12.1	35.3	12	0.9	7	2010	Authors	unpublished
Natural	Coniferous	128.1	42.4	860	3	200	29.9	625	4	WN	3.24624	12.1286	5.96	3.3	-16.5	20.5	750	2200	1200	3.114	38	33	27.2	1.4	7	2012	Authors	unpublished
Natural	Broadleaved	100.91	41.8333	1000	2	30	14.79	1267	30	NA	0.4	7	8.1	8.3	-5.6	15.7	37	3323	3800	3.112	10	35	30	2.2	7	2018	Authors	unpublished
Natural	Broadleaved	101.2	41.8	900	1	30	29.2994	1267	12	NA	1.89858	7.70645	7.54764	8.9	-12.5	26.3	43.6	2601.12	3950	3.104	7.307	54	14.65	1.11	7	2017	Authors	unpublished
Natural	Broadleaved	101.2	41.8	900	1	5	29.9	2000	12	NA	1.89858	7.70645	7.54764	8.9	-12.5	26.3	43.6	2601.12	3950	3.088	10.23	53	16.05	1.28	7	2017	Authors	unpublished
Natural	Broadleaved	101.2	41.8	900	1	15	29.6	1267	18	NA	1.89858	7.70645	7.54764	8.9	-12.5	26.3	43.6	2601.12	3950	3.076	4.43	41	13.2	0.94	7	2017	Authors	unpublished
Planted	Coniferous	106.2	27.2	979	1	47	12.37	1500	35	SW	0.69	1.9	4.46	13.8	3.7	21.2	1050	1345	766.1	8.7	54.4872	29.8851	11.288	1.63865	7	2017	Authors	unpublished
Natural	Coniferous	106.2	27.2	979	30	25	12.37	1500	37	SW	0.69	1.9	4.46	13.8	3.7	21.2	1050	1345	766.1	7.9	13	42.3	16.5	0.54	7	2017	Authors	unpublished
Natural	Coniferous	106.3	27.2	1020	30	25	15.36	1300	32	S	0.74	2.25	4.46	13.8	3.6	21.2	1050	1345	766.1	2.23	8.3	39.7	22.1	0.66	7	2017	Authors	unpublished
Planted	Coniferous	106.3	27.2	1020	1	47	15.36	1300	42	S	0.74	2.25	4.46	13.8	3.6	21.2	1050	1345	766.1	2.12	85.123	60.0204	20.1915	2.31779	7	2016	Authors	unpublished
Planted	Coniferous	106.3	27.2	1020	1	47	15.36	1300	42	S	0.74	2.25	4.46	13.8	3.6	21.2	1050	1345	766.1	2.04	62.6667	26.7206	11.748	1.68088	7	2017	Authors	unpublished
Planted	Coniferous	106.3	27.2	963	1	47	13.63	1600	33	S	0.71	2.1	4.46	13.8	3.7	21.2	1050	1345	766.1	1.83	50.0854	28.7719	12.29	1.65028	7	2017	Authors	unpublished
Natural	Coniferous	106.3	27.2	963	8	30	13.63	1600	33	S	0.71	2.1	4.46	13.8	3.7	21.2	1050	1345	766.1	1.8	5.46	38.86	20.5	1.9	6	2008	Authors	unpublished
Natural	Coniferous	106.3	27.2	963	1	75	13.63	1600	42	S	0.71	2.1	4.46	13.8	3.7	21.2	1050	1345	766.1	1.78	34.2092	31.6808	30.282	2.75942	7	2016	Authors	unpublished
Natural	Coniferous	100	27.62	3380	1	75	61.4	450	31	NA	0.9	3.3	5.01	5	-8.5	10.5	628	2200	1347.3	3.8	50.3975	19.0758	7.98301	0.805031	7	2016	Authors	unpublished
Planted	Coniferous	100	27.62	3200	1	47	43.6	450	30	NA	0.9	3.3	5.01	5.2	-8	11.8	632	2340	1347.3	3.6	72.3393	28	11.448	1.84323	7	2017	Authors	unpublished
Planted	Coniferous	100	27.62	3100	1	47	50.7	450	30	NA	0.9	3.3	5.01	5.4	-7	12.4	654	2100	1347.3	2.7	69.1404	28.0788	12.813	1.5876	7	2017	Authors	unpublished
Planted	Coniferous	100	27.62	3700	1	14	38.6	450	30	NA	0.9	3.3	5.01	4.5	-8.8	9.2	615	2323	1347.3	2.7	24.1	27.8	10.2	0.839813	6	2019	Authors	unpublished
Planted	Coniferous	119.62	29.12	18	1	47	4.83	500	0	NA	1.76624	13.4037	4.52779	17	6.5	32.2	1414	1651.35	1587	1.44	25.457	36.9193	14.9049	1.8226	7	2016	Authors	unpublished
Planted	Coniferous	119.62	29.12	18	1	47	4.73	500	0	NA	1.76624	13.4037	4.52779	17	6.5	32.2	1414	1651.35	1587	1.43	34.4874	27.2	15.9188	2.01793	7	2016	Authors	unpublished
Natural	Coniferous	101.83	29.6666	2850	1	75	14.79	1600	27	NA	2.68	28.47	5.97	8.5	4.1	16.7	1387	2100	1893	4.345	42.7784	32.1635	17.8842	3.07756	7	2016	Authors	unpublished
Planted	Coniferous	101.83	29.6666	2300	1	14	23.9	1600	30	S	2.56787	10.9141	6.08758	10	4.1	16.7	1600	2095.64	1893	5.6	20.8	24.1	11.748	1.18	6	2019	Authors	unpublished
Planted	Coniferous	108.7	30.15	1203	1	47	38.6	450	30	NA	2.12491	11.8275	5.5576	17.7	5.6	24	1287	1945.6	1109.2	34.1	52.2865	22.1045	15.3432	0.97	7	2016	Authors	unpublished
Planted	Coniferous	108.7	30.15	1203	1	47	38.6	450	30	NA	2.12491	11.8275	5.5576	17.7	5.6	24	1287	1945.6	1109.2	28.903	70.2222	25.9615	8.626	1.29876	7	2017	Authors	unpublished
Planted	Coniferous	108.7	30.15	1203	1	47	43.8	450	30	NA	2.12491	11.8275	5.5576	17.7	5.6	24	1287	1945.6	1109.2	28.31	72.1961	25.5	12.334	1.86422	7	2017	Authors	unpublished
Natural	Coniferous	112.48	35.008	360	8	30	11.5	720	41.5	N	1.84648	10.8257	5.81861	14.33	-0.1	27	650	2064.79	891.2	3.588	7.65	37	21	1.7	6	2008	Authors	unpublished
Planted	Coniferous	112.48	35.008	360	1	47	11.5	720	30	S	1.84648	10.8257	5.81861	14.33	-0.1	27	650	2064.79	891.2	2.983	62.9474	27.0142	12.843	1.43118	7	2017	Authors	unpublished
Natural	Coniferous	112.48	35.008	360	1	75	11.5	720	30	E	1.84648	10.8257	5.81861	14.33	-0.1	27	650	2064.79	891.2	29.83	32.7131	35.4336	8.15809	0.786534	7	2016	Authors	unpublished
Planted	Coniferous	112.48	35.008	360	1	47	11.5	720	30	W	1.84648	10.8257	5.81861	14.33	-0.1	27	650	2064.79	891.2	13.28	58.8333	30	14.046	1.69417	7	2017	Authors	unpublished
Natural	Coniferous	112.49	35.012	360	1	75	13.34	625	41.5	N	1.84708	10.8242	5.81833	14.33	-0.1	27	650	2064.8	891.2	6.56	37.1624	38.8206	13.1963	2.16491	7	2016	Authors	unpublished
Planted	Coniferous	112.49	35.012	360	1	14	6.2	625	30	E	1.84708	10.8242	5.81833	14.33	-0.1	27	650	2064.8	891.2	4.69	23.9	25.6	18.18	1.4	6	2019	Authors	unpublished
Natural	Coniferous	112.49	35.012	360	1	75	11.5	625	30	W	1.84708	10.8242	5.81833	14.33	-0.1	27	650	2064.8	891.2	33	54.6958	31.8905	14.4834	1.00056	7	2016	Authors	unpublished
Planted	Coniferous	112.49	35.012	360	1	47	11.5	625	30	S	1.84708	10.8242	5.81833	14.33	-0.1	27	650	2064.8	891.2	29.83	25.8069	43.2579	16.55	0.737445	7	2016	Authors	unpublished
Natural	Coniferous	108.66	35.3	1548	1	75	38.6	450	28	6	2.52194	9.52683	6.21872	7	-7	16.8	600	2203.22	1256	7	31.4478	39.4047	18.0423	1.75066	7	2016	Authors	unpublished
Natural	Coniferous	108.66	35.3	1559	1	75	38.6	450	23	3	2.52979	9.51582	6.21941	7	-7	16.8	600	2203.77	1256	7	14.2705	36	17.0512	1.9543	7	2016	Authors	unpublished
Natural	Coniferous	108.66	35.3	1380	1	75	33.9	450	40	8	2.40204	9.69482	6.20823	7	-7	16.8	600	2194.82	1256	7	14.3216	34	17.7014	1.05536	7	2016	Authors	unpublished
Planted	Coniferous	108.66	35.3	1360	1	47	61.4	450	31	4	2.38776	9.71482	6.20698	7	-7	16.8	600	2193.82	1256	2	27.0658	44.4797	14.5345	1.42267	7	2016	Authors	unpublished
Natural	Coniferous	108.66	35.3	1569	1	75	43.8	450	28	3	2.53692	9.50582	6.22003	7	-7	16.8	600	2204.27	1256	2	36.3646	31.8831	16.3358	2.90619	7	2016	Authors	unpublished
Planted	Coniferous	110.1	35.65	1000	1	47	27.707	1600	21	N	2.20946	9.94191	6.1185	9.8	-4.5	19.8	574.4	2167.44	1478	3.011	55.7541	28.2407	13.902	2.04747	7	2017	Authors	unpublished
Planted	Coniferous	110.1	35.65	1000	1	47	29	2000	21	S	2.20946	9.94191	6.1185	9.8	-4.5	19.8	574.4	2167.44	1478	3.8	67.9	28.0899	10.465	1.40297	7	2017	Authors	unpublished
Planted	Coniferous	103.4	36.03	1500	1	47	3.2	1867	0	NA	2.26	9.29761	6.70503	10.3	-2.3	23.2	327	2324.89	2589	23.56	72.0851	28.3133	12.664	1.51639	7	2017	Authors	unpublished
Planted	Coniferous	103.4	36.03	1500	1	47	9.4	1867	0	NA	2.26	9.29761	6.70503	10.3	-2.3	23.2	327	2324.89	2589	6.5	67.8156	18.9158	10.3558	2.04919	7	2016	Authors	unpublished
Planted	Coniferous	103.4	36.03	1500	1	47	16	1867	0	NA	2.26	9.29761	6.70503	10.3	-2.3	23.2	327	2324.89	2589	5.9	84.5897	20.2073	11.79	1.71669	7	2017	Authors	unpublished
Natural	Coniferous	103.4	36.03	1500	1	75	10	1867	4	NA	2.26	9.29761	6.70503	10.3	-2.3	23.2	327	2324.89	2589	5.9	48.5481	31.9149	18.7402	1.88282	7	2016	Authors	unpublished
Planted	Coniferous	103.4	36.03	1500	1	47	16	2610	0	NA	2.26	9.29761	6.70503	10.3	-2.3	23.2	327	2324.89	2589	5.7	41.2963	27.7404	15.5805	0.988996	7	2016	Authors	unpublished
Planted	Coniferous	103.4	36.03	1500	1	47	3.2	1867	0	NA	2.26	9.29761	6.70503	10.3	-2.3	23.2	327	2324.89	2589	4.8	42.2846	48.2111	15.5084	2.26686	7	2016	Authors	unpublished
Natural	Coniferous	103.4	36.03	1500	1	75	8	2610	0	NA	2.26	9.29761	6.70503	10.3	-2.3	23.2	327	2324.89	2589	4.5	39.3423	32.2593	14.8911	1.37512	7	2016	Authors	unpublished
Planted	Coniferous	103.4	36.03	1500	1	47	3.2	1867	3	NA	2.26	9.29761	6.70503	10.3	-2.3	23.2	327	2324.89	2589	3.8	58.7273	23.8095	12.781	1.49944	7	2017	Authors	unpublished
Planted	Coniferous	103.4	36.03	1500	1	47	3.2	1867	0	NA	2.26	9.29761	6.70503	10.3	-2.3	23.2	327	2324.89	2589	3.7	72.9773	22.6804	15.588	1.69078	7	2017	Authors	unpublished
Natural	Coniferous	103.4	36.03	1500	1	75	3.2	1867	3	NA	2.26	9.29761	6.70503	10.3	-2.3	23.2	327	2324.89	2589	3.6	31.8272	36.6715	14.0365	2.55066	7	2016	Authors	unpublished
Planted	Coniferous	103.4	36.03	1500	1	47	3.96	2610	0	NA	2.26	9.29761	6.70503	10.3	-2.3	23.2	327	2324.89	2589	2.4	56.4362	62.8726	18.1658	1.83144	7	2016	Authors	unpublished
Planted	Coniferous	103.4	36.03	1500	1	47	3.2	1867	3	NA	2.26	9.29761	6.70503	10.3	-2.3	23.2	327	2324.89	2589	1.94	58.5213	27.4	17.829	1.83727	7	2016	Authors	unpublished
Planted	Coniferous	112.15	36.55	1563	1	47	23.9	1267	24	NA	2.73513	9.03714	6.10937	6.2	-2.8	11.8	662	2202.36	1478.4	11.4	77.0244	25.3086	15.136	1.65739	7	2017	Authors	unpublished
Natural	Coniferous	112.15	36.55	1563	1	75	23.9	1267	24	NA	2.73513	9.03714	6.10937	6.2	-2.8	11.8	662	2202.36	1945.6	3.211	34.8943	33.8224	17.5548	1.62543	7	2016	Authors	unpublished
Natural	Coniferous	112.15	36.55	1563	1	75	23.9	1267	24	NA	2.73513	9.03714	6.10937	6.2	-2.8	11.8	662	2202.36	1945.6	26.2	47.4381	26.7237	15.3607	1.47732	7	2016	Authors	unpublished
Natural	Coniferous	112.15	36.55	1563	1	75	23.9	1267	24	NA	2.73513	9.03714	6.10937	6.2	-2.8	11.8	662	2202.36	1770	23.7	41.749	29.6634	16.9765	0.945118	7	2016	Authors	unpublished
Natural	Coniferous	112.15	36.55	1563	1	75	23.9	1267	24	NA	2.73513	9.03714	6.10937	6.2	-2.8	11.8	662	2202.36	1256	23.7	32.3834	39.6793	3.76744	0.911529	7	2016	Authors	unpublished
Planted	Coniferous	112.15	36.55	1563	1	47	23.9	1267	24	NA	2.73513	9.03714	6.10937	6.2	-2.8	11.8	662	2202.36	1369	13.2	63.551	27.0718	9.575	1.47098	7	2017	Authors	unpublished
Natural	Coniferous	112.15	36.55	1563	1	75	23.9	1267	24	NA	2.73513	9.03714	6.10937	6.2	-2.8	11.8	662	2202.36	1369	11.4	36.6981	33.4649	8.76403	1.60328	7	2016	Authors	unpublished
Natural	Coniferous	112.15	36.55	1563	1	75	23.9	1267	24	NA	2.73513	9.03714	6.10937	6.2	-2.8	11.8	662	2202.36	1770	10.8	39.2911	26.7253	15.0517	1.94475	7	2016	Authors	unpublished
Natural	Coniferous	112.15	36.55	1563	1	75	23.9	1267	24	NA	2.73513	9.03714	6.10937	6.2	-2.8	11.8	662	2202.36	1874	9.5	31.8351	44.783	11.9398	1.74185	7	2016	Authors	unpublished
Natural	Coniferous	111.4	37.8	2000	1	75	26.1146	1267	32	NA	3.04853	8.12545	6.34806	4.3	-10.2	17.5	822.6	2295.23	1268	12.3	20.3844	24	13.3395	1.1	7	2016	Authors	unpublished
Natural	Coniferous	111.4	37.8	1940	1	75	29	1267	25	NA	3.00571	8.18545	6.34431	4.3	-10.2	17.5	822.6	2292.23	1268	11.2	53.7128	28.0452	15.0992	1.73235	7	2016	Authors	unpublished
Planted	Coniferous	111.4	37.8	1880	1	47	35.6688	1267	4	NA	2.96289	8.24545	6.34057	4.3	-10.2	17.5	822.6	2289.23	1268	9.4	28.2918	40.6227	26.1105	2.50336	7	2016	Authors	unpublished
Planted	Coniferous	111.4	37.8	1820	1	47	35.6688	720	22	NA	2.92006	8.30545	6.33682	4.3	-10.2	17.5	822.6	2286.23	1268	7.8	20.2185	55.5538	17.5548	1.66025	7	2016	Authors	unpublished
Planted	Coniferous	111.4	37.8	1760	1	47	34.2	625	19.5	NA	2.87724	8.36545	6.33307	4.3	-10.2	17.5	822.6	2283.23	1268	6.3	53.9184	22.9362	12.5374	1.85914	7	2016	Authors	unpublished
Planted	Coniferous	115.58	39.945	560	1	47	3.2	500	0	NA	2.28253	8.75089	6.20612	2.7	-8.6	23.7	500	2251.45	1760	3.125	24.2926	31	13.5898	1.73491	7	2016	Authors	unpublished
Planted	Coniferous	115.58	39.945	560	1	47	3.2	500	0	NA	2.28253	8.75089	6.20612	2.7	-8.6	23.7	500	2251.45	1760	21	28.3302	43.9225	14.8624	2.3843	7	2016	Authors	unpublished
Natural	Broadleaved	115.46	40.02	890	3	NA	50.7	450	12	NA	2.51459	8.39241	6.2451	7.5	-8.8	24.7	550	2273.5	1760	17.87	19.93	30.3	31.53	1.604	7	2011	Authors	unpublished
Natural	Broadleaved	115.46	40.02	890	3	NA	61.4	450	19.5	NA	2.51459	8.39241	6.2451	7.5	-8.8	24.7	550	2273.5	1760	30.41	18.3	36.6	25.62	1.525	7	2011	Authors	unpublished
Natural	Broadleaved	115.46	40.02	890	3	NA	43.6	450	19.5	NA	2.51459	8.39241	6.2451	7.5	-8.8	24.7	550	2273.5	1760	30.41	21.87	35.4	26.56	1.463	7	2011	Authors	unpublished
Natural	Broadleaved	115.58	39.945	560	6	30	38.6	450	4	NA	2.28253	8.75089	6.20612	2.7	-8.6	23.7	500	2251.45	1760	21	12.4	32.2	13	1.05	7	2010	Authors	unpublished
Natural	Broadleaved	115.58	39.945	560	6	NA	38.6	450	10	NA	2.28253	8.75089	6.20612	2.7	-8.6	23.7	500	2251.45	1760	30	13.2	35.3	11	0.75	7	2010	Authors	unpublished
Natural	Broadleaved	115.58	39.945	560	6	49	43.6	450	5	NA	2.28253	8.75089	6.20612	2.7	-8.6	23.7	500	2251.45	1760	17	15.4	32.1	11	1.2	7	2010	Authors	unpublished
Natural	Broadleaved	115.58	39.945	560	6	NA	61.4	450	5	NA	2.28253	8.75089	6.20612	2.7	-8.6	23.7	500	2251.45	1760	42	18.7	24.5	12	0.83	7	2010	Authors	unpublished
Natural	Broadleaved	115.58	39.945	560	6	NA	50.7	450	15	NA	2.28253	8.75089	6.20612	2.7	-8.6	23.7	500	2251.45	1760	23	8.7	33.1	12	1	7	2010	Authors	unpublished
Natural	Broadleaved	115.58	39.945	560	6	NA	43.6	450	15	NA	2.28253	8.75089	6.20612	2.7	-8.6	23.7	500	2251.45	1760	44	24.2	35.2	9.3	1.3	7	2010	Authors	unpublished
Natural	Broadleaved	115.58	39.945	560	6	52	43.8	450	5	NA	2.28253	8.75089	6.20612	2.7	-8.6	23.7	500	2251.45	1760	21	14.3	26.2	10	1.05	7	2010	Authors	unpublished
Natural	Broadleaved	108.66	35.3	1487	1	37.5	43.6	450	31	4	2.4784	9.58783	6.21491	7	-7	16.8	600	2200.17	1256	33	13	55	14.5	1.3	8	2010	Authors	unpublished
Natural	Broadleaved	108.66	35.3	1450	1	20	61.4	450	17	2	2.45199	9.62482	6.2126	7	-7	16.8	600	2198.32	1256	33	13	55	14.5	1.3	8	2010	Authors	unpublished
Natural	Broadleaved	108.66	35.3	1500	1	NA	37.5	450	38	8	2.48768	9.57483	6.21572	7	-7	16.8	600	2200.82	1256	33	13	55	14.5	1.3	8	2010	Authors	unpublished
Natural	Broadleaved	108.66	35.3	1468	1	20	43.8	450	25	2	2.46484	9.60683	6.21372	7	-7	16.8	600	2199.22	1256	24	18	40	17.3	1.25	8	2010	Literatures	LI et al. （2012）
Natural	Broadleaved	108.66	35.3	1258	1	15	61.4	450	25	1	2.31496	9.81682	6.20061	7	-7	16.8	600	2188.72	1256	24	18	40	17.3	1.25	8	2010	Literatures	LI et al. （2012）
Natural	Broadleaved	108.66	35.3	1450	1	25	61.4	450	22	3	2.45199	9.62482	6.2126	7	-7	16.8	600	2198.32	1256	24	18	40	17.3	1.25	8	2010	Literatures	LI et al. （2012）
Natural	Broadleaved	108.66	35.3	1543	1	15	61.4	450	9	3	2.51837	9.53182	6.21841	7	-7	16.8	600	2202.97	1256	4.8	26	33	25.2	2.2	8	2010	Literatures	LI et al. （2012）
Natural	Broadleaved	108.66	35.3	1135	1	20	61.4	450	19	2	2.22718	9.93983	6.19293	7	-7	16.8	600	2182.57	1256	4.8	26	33	25.2	2.2	8	2010	Literatures	LI et al. （2012）
Natural	Broadleaved	108.66	35.3	1140	1	15	43.6	450	14	6	2.23075	9.93483	6.19324	7	-7	16.8	600	2182.82	1256	4.8	26	33	25.2	2.2	8	2010	Literatures	LI et al. （2012）
Natural	Broadleaved	104.85	32.3	1424	4	15	29.9	450	30	NA	2.16389	10.7901	6.12924	11.298	4.1	21.3	952	2122.66	1485.12	33	16.3	46.8	23.88	1.86	8	2013	Literatures	He et al. (2019)
Natural	Broadleaved	104.85	32.3	2119	6	NA	30.3	450	25	NA	2.65992	10.0951	6.17264	7.128	-8.5	20.7	900	2157.41	1404	26.2	22	24	23	2	8	2013	Literatures	He et al. (2019)
Natural	Broadleaved	104.85	32.3	2238	10	NA	14.79	450	35	NA	2.74485	9.97607	6.18007	6.414	-0.1	17.5	870	2163.36	1357.2	25.5384	19	36	24	1.38	8	2013	Literatures	He et al. (2019)
Natural	Broadleaved	104.85	32.3	2328	5	NA	16.5605	450	30	NA	2.80908	9.88607	6.18569	5.874	-0.1	16.8	867	2167.86	1352.52	0.128	21	36.5	27	1.36	8	2013	Literatures	He et al. (2019)
Natural	Broadleaved	104.85	32.3	2446	13	NA	11.5	450	26	NA	2.8933	9.76807	6.19306	5.166	-0.1	11.8	865	2173.76	1349.4	29.54	16.5	38	25	1.58	8	2013	Literatures	He et al. (2019)
Natural	Broadleaved	104.85	32.3	2523	10	NA	14.79	450	22	NA	2.94825	9.69107	6.19787	4.704	-2.8	17.5	860	2177.61	1341.6	48.4254	14.5	40	22	1.72	8	2013	Literatures	He et al. (2019)
Natural	Broadleaved	104.85	32.3	2619	11	NA	11.5	450	30	NA	3.01677	9.59507	6.20387	4.128	-8	16.8	859	2182.41	1340.04	26.81	20.8	40.5	27.5	1.76	8	2013	Literatures	He et al. (2019)
Natural	Broadleaved	104.85	32.3	2710	8	NA	11.5	450	18	NA	3.08171	9.50408	6.20955	3.582	-7.8	21.7	855	2186.96	1333.8	59.4	17.9	41	21.8	1.52	8	2013	Literatures	He et al. (2019)
Natural	Broadleaved	104.85	32.3	2816	5	NA	6.2	450	30	NA	3.15736	9.39808	6.21617	2.946	-8	20.7	850	2192.26	1326	130	17.5	42.3	25.2	1.55	8	2013	Literatures	He et al. (2019)
Natural	Broadleaved	104.85	32.3	2912	6	NA	14.79	450	30	NA	3.22588	9.30208	6.22216	2.37	-8.5	20.7	849	2197.06	1324.44	81.73	16	43.6	27.3	1.82	8	2013	Literatures	He et al. (2019)
Natural	Broadleaved	104.85	32.3	3000	7	NA	11.5	450	23	NA	3.28869	9.21407	6.22766	1.842	-2.8	13.5	845	2201.46	1318.2	0.159	15.8	44.1	19	1.21	8	2013	Literatures	He et al. (2019)
Natural	Broadleaved	104.85	32.3	3109	9	NA	14.79	450	12	NA	3.36648	9.10507	6.23447	1.188	-2.8	16.7	843	2206.91	1315.08	0.166	14	46.5	23	1.28	8	2013	Literatures	He et al. (2019)
Natural	Broadleaved	104.85	32.3	3216	8	NA	11.5	450	6	NA	3.44284	8.99808	6.24115	0.546	-2.8	14.3	842	2212.26	1313.52	0.817	13	47.9	24	1.5	8	2013	Literatures	He et al. (2019)
Natural	Broadleaved	104.85	32.3	3336	4	NA	14.79	450	6	NA	3.52849	8.87808	6.24864	-0.174	-7.8	16.8	840	2218.26	1310.4	30.46	5	52	17.3	1.3	8	2013	Literatures	He et al. (2019)
Natural	Broadleaved	110.5	31.6	780	17	40	7.9	2000	41.5	NA	1.95133	11.6999	5.57384	10.6	4.1	16.7	1722	1961.1	567	39.17	10.8	45	14.2	1.1	7	2010	Literatures	Luo et al. (2011)
Natural	Broadleaved	110.5	31.6	1670	21	NA	13.34	1600	21	NA	2.58652	10.8099	5.62942	9.4	4.8	16.8	1500	2005.6	1874	65.6	16.6	33	11.3	0.75	7	2010	Literatures	Luo et al. (2012)
Natural	Broadleaved	110.5	31.6	1970	10	NA	17.59	1100	19	NA	2.80063	10.5099	5.64815	8.9	-5.6	19.8	1400	2020.6	560	43.12	20	32	13.9	1.76	7	2010	Literatures	Luo et al. (2013)
Natural	Broadleaved	110.5	31.6	2570	5	NA	24.82	800	22	NA	3.22885	9.9099	5.68562	8.6	-0.1	20.7	1306	2050.6	1893	55.95	6.36	40	10.1	1.7	7	2010	Literatures	Luo et al. (2014)
Natural	Broadleaved	109.2	30.1	1200	144	NA	11.5	450	17	NA	0.548	3.9	4.48	17.7	5.6	24	1287	1300	1109.2	50	18.9	45	18.9	0.76	7	2013	Authors	unpublished
Natural	Broadleaved	109.2	30.1	1200	144	NA	11.5	450	6	NA	0.548	3.9	4.48	17.7	5.6	24	1287	1300	1109.2	47	23.4	42	22.1	0.65	7	2013	Authors	unpublished
Natural	Broadleaved	109.2	30.1	1200	144	NA	11.5	450	6	NA	0.548	3.9	4.48	17.7	5.6	24	1287	1300	1109.2	70	30.7	19	15.4	0.48	7	2013	Authors	unpublished
Natural	Broadleaved	109.2	30.1	1200	144	NA	6.2	450	6	NA	0.548	3.9	4.48	17.7	5.6	24	1287	1300	1109.2	42	14.7	44	26.7	0.84	7	2013	Authors	unpublished
Natural	Broadleaved	116.02	29.95	31	1	15	37.5	450	21	NA	1.62949	13.0755	4.90432	17.1	1.8	28.9	1347.4	1752.3	1745.8	29.25	38.47	22.34	27.05	1.69	7	2018	Authors	unpublished
Natural	Broadleaved	116.02	29.95	31	1	30	43.8	450	21	NA	1.62949	13.0755	4.90432	17.1	1.8	28.9	1347.4	1752.3	1745.8	10.77	16.93	40.32	19.24	2.07	7	2018	Authors	unpublished
Natural	Broadleaved	116.02	29.95	31	1	20	29.6	450	31	NA	1.62949	13.0755	4.90432	17.1	1.8	28.9	1347.4	1752.3	1745.8	23.32	28.46	31.23	19.89	1.85	7	2018	Authors	unpublished
Natural	Broadleaved	101.83	29.6666	2300	5	21	29.2994	1267	19	S	2.56787	10.9141	6.08758	10	4.1	16.7	1600	2095.64	1893	8.65	9.5	51.245	13.98	1.28	7	2013	Authors	unpublished
Natural	Broadleaved	101.83	29.6666	2300	5	20	19.9	1600	27	S	2.56787	10.9141	6.08758	10	4.1	16.7	1600	2095.64	1893	32.5856	15.6	41.2	27.42	1.41	7	2013	Authors	unpublished
Natural	Broadleaved	101.83	29.6666	2300	5	NA	23.9	1600	30	S	2.56787	10.9141	6.08758	10	4.1	16.7	1600	2095.64	1893	36.34	19.8	24.5	33.71	1.42	7	2013	Authors	unpublished
Natural	Broadleaved	101.83	29.6666	2300	5	NA	30.5732	1267	30	S	2.56787	10.9141	6.08758	10	4.1	16.7	1600	2095.64	1893	28.9	25	28.5	43.5	1.38	7	2013	Authors	unpublished
Natural	Broadleaved	101.83	29.6666	2300	5	20	38.535	1267	31	S	2.56787	10.9141	6.08758	10	4.1	16.7	1600	2095.64	1893	41	15	41.8199	17.58	1.26	7	2013	Authors	unpublished
Natural	Broadleaved	101.83	29.6666	2850	3	NA	14.79	2000	25	NA	2.68	28.47	5.97	8.5	4.1	16.7	1387	2100	1893	34.1	14.15	38.5	22.27	2.1	7	2013	Authors	unpublished
Natural	Broadleaved	101.83	29.6666	2850	3	NA	10	2000	30	NA	3.02	20.46	4.73	8.5	4.1	16.7	1387	2100	1893	42	10.32	38.37	13.39	1.79471	7	2013	Authors	unpublished
Natural	Broadleaved	101.83	29.6666	2850	3	NA	35.6688	1600	12	NA	2.63	6.74	6.5	8.5	4.1	16.7	1387	2100	1893	8.65	16.01	37.56	24.93	1.72	7	2013	Authors	unpublished
Natural	Broadleaved	101.83	29.6666	2850	3	NA	14.79	1267	30	NA	2.68	28.47	5.97	8.5	4.1	16.7	1387	2100	1893	6.26	14.14	39.73	25.9	1.21828	7	2013	Authors	unpublished
Natural	Broadleaved	101.83	29.6666	2850	3	NA	18.8	2000	24	NA	3.02	20.46	4.73	8.5	4.1	16.7	1387	2100	1893	20.53	12.29	38.19	15.97	2.57791	7	2013	Authors	unpublished
Natural	Broadleaved	101.83	29.6666	2850	3	NA	30.2548	2000	31	NA	3.02	20.46	4.73	8.5	4.1	16.7	1387	2100	1893	62.5	10.53	42.26	14.33	1.89	7	2013	Authors	unpublished
Natural	Broadleaved	119.64	29.214	1078	50	NA	6.2	450	20	S	2.5265	12.308	4.60408	17.2	5.1	29.1	252	1708.39	1878	16.38	15.989	40.23	22.59	0.88	7	2016	Authors	unpublished
Natural	Broadleaved	101.8	25.7	1300	15	30	23.9	450	25	NA	1.73514	13.4204	5.53714	21.9	14.9	27.1	613.8	1861.54	3911	26.81	6.7	47	23.67	1.4	7	2011	Literatures	Zheng et al. (2011)
Natural	Broadleaved	101.8	25.7	1300	15	40	14.79	450	21	NA	1.73514	13.4204	5.53714	21.9	14.9	27.1	613.8	1861.54	3911	73.1	13.695	42	13.19	0.88	7	2011	Literatures	Zheng et al. (2011)
Natural	Broadleaved	101.8	25.7	1300	15	30	14.9682	450	24	NA	1.73514	13.4204	5.53714	21.9	14.9	27.1	613.8	1861.54	3911	10.77	14.304	67.8632	15.68	0.9	7	2011	Literatures	Zheng et al. (2011)
Natural	Broadleaved	101.8	25.7	1300	15	15	14.79	450	17	NA	1.73514	13.4204	5.53714	21.9	14.9	27.1	613.8	1861.54	3911	24.97	17.863	53	14.05	0.88	7	2011	Literatures	Zheng et al. (2011)
Natural	Broadleaved	101.8	25.7	1300	15	5	14.79	450	24	NA	1.73514	13.4204	5.53714	21.9	14.9	27.1	613.8	1861.54	3911	23.7	4.688	48.3	31.78	1.2	7	2011	Literatures	Zheng et al. (2011)
Natural	Broadleaved	101.8	25.7	1300	15	30	23.9	450	14	NA	1.73514	13.4204	5.53714	21.9	14.9	27.1	613.8	1861.54	3911	44.52	6.033	41.7	25.16	1.4	7	2011	Literatures	Zheng et al. (2011)
Natural	Broadleaved	101.8	25.7	1300	15	5	6.2	450	31	NA	1.73514	13.4204	5.53714	21.9	14.9	27.1	613.8	1861.54	3911	33	6.276	43.5	25.24	0.88	7	2011	Literatures	Zheng et al. (2011)
Natural	Broadleaved	101.8	25.7	1300	15	15	14.79	450	30	NA	1.73514	13.4204	5.53714	21.9	14.9	27.1	613.8	1861.54	3911	32.87	6.659	48.3	27.43	0.88	7	2011	Literatures	Zheng et al. (2011)
Natural	Broadleaved	101.8	25.7	1300	15	15	20.0637	450	26	NA	1.73514	13.4204	5.53714	21.9	14.9	27.1	613.8	1861.54	3911	39.02	7.404	43.5	22.28	1.4	7	2011	Literatures	Zheng et al. (2011)
Natural	Broadleaved	101.8	25.7	1300	15	20	14.79	450	25	NA	1.73514	13.4204	5.53714	21.9	14.9	27.1	613.8	1861.54	3911	60	7.929	58	17.28	0.6	7	2011	Literatures	Zheng et al. (2011)
Natural	Broadleaved	101.8	25.7	1300	15	49	6.2	450	30	NA	1.73514	13.4204	5.53714	21.9	14.9	27.1	613.8	1861.54	3911	42	8.662	41.7	17.44	0.6	7	2011	Literatures	Zheng et al. (2011)
Natural	Broadleaved	101.8	25.7	1300	15	15	14.79	450	21	NA	1.73514	13.4204	5.53714	21.9	14.9	27.1	613.8	1861.54	3911	50	9.49	47.3	13.34	0.63	7	2011	Literatures	Zheng et al. (2011)
Natural	Broadleaved	101.8	25.7	1300	15	15	14.79	450	17	NA	1.73514	13.4204	5.53714	21.9	14.9	27.1	613.8	1861.54	3911	43.12	9.574	47.3	20.34	0.6	7	2011	Literatures	Zheng et al. (2011)
Natural	Broadleaved	101.8	25.7	1300	15	55	6.2	450	28	NA	1.73514	13.4204	5.53714	21.9	14.9	27.1	613.8	1861.54	3911	70	11.149	41.96	14.04	0.88	7	2011	Literatures	Zheng et al. (2011)
Natural	Broadleaved	101.8	25.7	1300	15	15	14.79	450	30	NA	1.73514	13.4204	5.53714	21.9	14.9	27.1	613.8	1861.54	3911	34.73	12.427	58	12.98	1.2	7	2011	Literatures	Zheng et al. (2011)
Natural	Broadleaved	101.8	25.7	1300	15	20	23.9	450	32	NA	1.73514	13.4204	5.53714	21.9	14.9	27.1	613.8	1861.54	3911	24.97	14.04	58	25.12	0.88	7	2011	Literatures	Zheng et al. (2011)
Natural	Broadleaved	101.8	25.7	1300	15	15	30	450	19	NA	1.73514	13.4204	5.53714	21.9	14.9	27.1	613.8	1861.54	3911	39.17	14.068	30	13.98	1.4	7	2011	Literatures	Zheng et al. (2011)
Natural	Broadleaved	101.8	25.7	1300	15	36	11.5	450	24	NA	1.73514	13.4204	5.53714	21.9	14.9	27.1	613.8	1861.54	3911	43.41	16.072	49.64	17.47	1.2	7	2011	Literatures	Zheng et al. (2011)
Natural	Broadleaved	105.65	25.66	876	3	30	6.2	450	30	NA	1.61383	13.8596	5.21362	18.4	8.9	29.8	1100	1772.53	1456	14.94	12.3	42.1	9.8	2.2	7	2019	Authors	unpublished
Natural	Broadleaved	105.65	25.66	876	6	25	11.5	450	30	NA	1.61383	13.8596	5.21362	18.4	8.9	29.8	1100	1772.53	1456	16.2	12.4	28.2	19.1	2.4	7	2019	Authors	unpublished
Natural	Broadleaved	119.7	25.5	118	23	35	11.5	450	18	NA	2.9	3.57143	4.3	19.4	11	28	1500	1919.7	1917.4	47	11.2	37.6	28.4	0.79	7	2017	Literatures	Huang et al. (2017)
Natural	Broadleaved	119.7	25.5	118	23	35	14.79	450	18	NA	2.9	3.57143	4.3	19.4	11	28	1500	1919.7	1917.4	47	13.2	44.1	25.2	0.76	7	2017	Literatures	Huang et al. (2017)
Natural	Broadleaved	119.7	25.5	118	23	35	6.2	450	18	NA	2.9	3.57143	4.3	19.4	11	28	1500	1919.7	1917.4	42	8.8	39.8	23.3	0.93	7	2017	Literatures	Huang et al. (2017)
Natural	Broadleaved	119.7	25.5	118	23	35	13.34	450	18	NA	2.9	3.57143	4.3	19.4	11	28	1500	1919.7	1917.4	47	9.3	38.4	22.9	0.61	7	2017	Literatures	Huang et al. (2017)
Natural	Broadleaved	108.366	23.45	1115	20	15	43.8	450	18	NA	1.84762	14.4599	4.74932	15.1	5.8	21.9	2630	1635.1	1984	82.79	15.6	38	16.3	1.7	10	2012	Literatures	Xie et al. （2013）
Natural	Broadleaved	108.366	23.45	1115	20	5	43.8	450	12	NA	1.84762	14.4599	4.74932	15.1	5.8	21.9	2630	1635.1	1984	81.69	12.2	43	13.8	1.4	10	2012	Literatures	Xie et al. （2013）
Natural	Broadleaved	108.366	23.45	1115	20	30	38.6	450	22	NA	1.84762	14.4599	4.74932	15.1	5.8	21.9	2630	1635.1	1984	79.74	13.8	36.4	13.3	1.2	10	2012	Literatures	Xie et al. （2013）
Natural	Broadleaved	107.5	23.1	530	23	30	29.6	450	30	NA	1.37868	15.1778	4.73523	21	13.2	26.6	1400	1500	1734	82.79	7.806	47.1	15.97	0.66	11	2017	Literatures	Xie et al. （2013）
Natural	Broadleaved	107.5	23.1	530	43	5	11.5	450	41.5	S	1.37868	15.1778	4.73523	21	13.2	26.6	1400	1500	1734	88.09	8.381	44	15.93	0.73	11	2017	Literatures	Xie et al. （2013）
Natural	Broadleaved	107.5	23.1	530	23	20	28.5	450	30	N	1.37868	15.1778	4.73523	21	13.2	26.6	1400	1500	1734	79.74	7.795	45	17.23	0.66	11	2017	Literatures	Xie et al. （2013）
Natural	Broadleaved	107.5	23.1	530	23	30	30.3	450	30	E	1.37868	15.1778	4.73523	21	13.2	26.6	1400	1500	1734	81.69	8.846	41	17.89	0.66	11	2017	Literatures	Xie et al. （2013）
Natural	Broadleaved	107.5	23.1	530	23	30	29.6	450	30	W	1.37868	15.1778	4.73523	21	13.2	26.6	1400	1500	1734	81.73	6.75	54	13.23	0.58	11	2017	Literatures	Xie et al. （2013）
Natural	Broadleaved	103.7	23.1	1775	25	20	6.2	450	20	NA	2.08711	13.9328	5.10129	14.3	2.1	26.7	1650	1731.74	1989	37.36	9.75	41.2644	13.8738	1.56831	7	2019	Literatures	Xie et al. （2013）
Natural	Broadleaved	103.7	23.1	1774	28	40	13.34	450	25	NA	2.0864	13.9338	5.10123	14.3	2.1	26.7	1650	1731.69	1990	28.9	10.48	39.6464	17.2878	1.68203	7	2019	Literatures	Xie et al. （2013）
Natural	Broadleaved	103.7	23.1	1765	26	NA	14.79	450	28.5	NA	2.07998	13.9428	5.10067	14.3	2.1	26.7	1650	1731.24	1991	16.38	9.95	44.2564	17.1158	1.53726	7	2019	Literatures	Xie et al. （2013）
Natural	Broadleaved	107.5	23	330	1	20	61.4	450	41.5	N	1.23297	15.4157	4.71038	20.5	8.5	30.9	1400	1589.74	1180	79.74	7.8	45	17.23	0.66	11	2017	Literatures	Xie et al. （2013）
Natural	Broadleaved	107.5	23	330	1	5	43.8	450	30	E	1.23297	15.4157	4.71038	20.5	8.5	30.9	1400	1589.74	1180	81.69	8.85	41	17.89	0.66	11	2017	Literatures	Xie et al. （2013）
Natural	Broadleaved	107.5	23	330	1	30	50.7	450	30	S	1.23297	15.4157	4.71038	20.5	8.5	30.9	1400	1589.74	1180	88.09	8.38	44	15.93	0.73	11	2017	Literatures	Xie et al. （2013）
Natural	Broadleaved	107.5	23	330	1	5	43.6	450	41.5	W	1.23297	15.4157	4.71038	20.5	8.5	30.9	1400	1589.74	1180	81.73	6.75	54	13.23	0.58	11	2017	Literatures	Xie et al. （2013）
Natural	Broadleaved	101.25	21.933	600	16	15	25.2	450	41.5	NA	1.09778	15.5509	5.06955	21.7	10.5	31	1550	1660.65	1369	36.87	4.535	41.64	19.19	2.2	7	2011	Literatures	Dong et al. (2012）
Natural	Broadleaved	101.25	21.933	600	16	15	35.6688	450	41.5	NA	1.09778	15.5509	5.06955	21.7	10.5	31	1550	1660.65	1369	17.03	4.769	32	18.31	0.66	7	2011	Literatures	Dong et al. (2012）
Natural	Broadleaved	101.25	21.933	600	16	37.5	30	450	30	NA	1.09778	15.5509	5.06955	21.7	10.5	31	1550	1660.65	1369	17.87	4.979	43.1	28.82	1.7	7	2011	Literatures	Dong et al. (2012）
Natural	Broadleaved	101.25	21.933	600	16	15	38.535	450	35	NA	1.09778	15.5509	5.06955	21.7	10.5	31	1550	1660.65	1369	25.34	5.043	67.8632	30.58	2.07	7	2011	Literatures	Dong et al. (2012）
Natural	Broadleaved	101.25	21.933	600	16	15	35.6688	450	30	NA	1.09778	15.5509	5.06955	21.7	10.5	31	1550	1660.65	1369	19.38	5.048	42.1	18.17	0.66	7	2011	Literatures	Dong et al. (2012）
Natural	Broadleaved	101.25	21.933	600	16	30	44.586	450	41.5	NA	1.09778	15.5509	5.06955	21.7	10.5	31	1550	1660.65	1369	25.15	5.188	66	11.8	0.54	7	2011	Literatures	Dong et al. (2012）
Natural	Broadleaved	101.25	21.933	600	16	5	27.707	450	41.5	NA	1.09778	15.5509	5.06955	21.7	10.5	31	1550	1660.65	1369	31.37	5.282	55	21.22	0.972871	7	2011	Literatures	Dong et al. (2012）
Natural	Broadleaved	101.25	21.933	600	16	30	34.0764	450	30	NA	1.09778	15.5509	5.06955	21.7	10.5	31	1550	1660.65	1369	50	5.343	43.6	20.15	0.61	7	2011	Literatures	Dong et al. (2012）
Natural	Broadleaved	101.25	21.933	600	16	15	10	450	35	NA	1.09778	15.5509	5.06955	21.7	10.5	31	1550	1660.65	1369	17.03	5.85	49.64	15.8	1.14695	7	2011	Literatures	Dong et al. (2012）
Natural	Broadleaved	101.25	21.933	600	16	20	29	450	41.5	NA	1.09778	15.5509	5.06955	21.7	10.5	31	1550	1660.65	1369	13	5.876	47	36.71	1.5	7	2011	Literatures	Dong et al. (2012）
Natural	Broadleaved	101.25	21.933	600	16	15	31.4	450	30	NA	1.09778	15.5509	5.06955	21.7	10.5	31	1550	1660.65	1369	21.45	6.144	47	15.57	1.36	7	2011	Literatures	Dong et al. (2012）
Natural	Broadleaved	101.25	21.933	600	16	30	22.6115	450	41.5	NA	1.09778	15.5509	5.06955	21.7	10.5	31	1550	1660.65	1369	18.97	7.311	45.18	25.8	1.48	7	2011	Literatures	Dong et al. (2012）
Natural	Broadleaved	101.25	21.933	600	16	20	30.3	450	30	NA	1.09778	15.5509	5.06955	21.7	10.5	31	1550	1660.65	1369	25.15	8.949	33.1	17.83	0.48	7	2011	Literatures	Dong et al. (2012）
Natural	Broadleaved	101.25	21.933	600	16	5	33.9	450	30	NA	1.09778	15.5509	5.06955	21.7	10.5	31	1550	1660.65	1369	17.03	9.031	32.3	18.93	0.53	7	2011	Literatures	Dong et al. (2012）
Natural	Broadleaved	101.25	21.933	600	16	15	32.4841	450	30	NA	1.09778	15.5509	5.06955	21.7	10.5	31	1550	1660.65	1369	10.97	9.316	43.32	11.89	1.37512	7	2011	Literatures	Dong et al. (2012）
Natural	Broadleaved	101.25	21.933	600	16	5	10.828	450	30	NA	1.09778	15.5509	5.06955	21.7	10.5	31	1550	1660.65	1369	28.81	5.712	49.6	17.73	0.76	7	2011	Literatures	Dong et al. (2012）
Natural	Broadleaved	101.25	21.933	600	16	15	27.707	450	41.5	NA	1.09778	15.5509	5.06955	21.7	10.5	31	1550	1660.65	1369	50.06	7.162	49.64	20.65	1.04	7	2011	Literatures	Dong et al. (2012）
Natural	Broadleaved	108.95	19.1	100	2	15	43.6	450	20	NA	1.02191	17.1268	4.10397	22.5	9.8	30.8	2553	1371.9	2015	82.79	13.5	12.3	15.1	0.6	7	2012	Literatures	Dong et al. (2012）
Planted	Broadleaved	81.1	43.8	1800	1	1	3.2	1250	35	NA	0.72	1.17	8.8	10.3	-7	24.7	301.6	3000	1550	89.38	8.925	38.69	36.33	1.66	8	2020	Literatures	Xu et al. (2021)
Planted	Broadleaved	81.1	43.8	1800	1	1	3.2	1250	32	NA	0.72	1.17	8.8	10.3	-7	24.7	301.6	3000	1550	78.49	9.534	36.82	19.78	0.665935	8	2020	Literatures	Xu et al. (2021)
Planted	Broadleaved	81.1	43.8	1800	1	1	3.2	1250	37	NA	0.72	1.17	8.8	10.3	-7	24.7	301.6	3000	1550	72.5	9.807	37.83	34.2	1.83875	8	2020	Literatures	Xu et al. (2021)
Planted	Broadleaved	81.1	43.8	1800	1	1	3.2	1250	33	NA	0.72	1.17	8.8	10.3	-7	24.7	301.6	3000	1550	81.21	10.74	37.11	36.55	1.83875	8	2020	Literatures	Xu et al. (2021)
Planted	Broadleaved	81.1	43.8	1800	1	1	3.2	1250	37	NA	0.72	1.17	8.8	10.3	-7	24.7	301.6	3000	1550	88.04	8.633	45.8	36.33	2.3	8	2020	Literatures	Xu et al. (2021)
Planted	Broadleaved	81.1	43.8	1800	1	1	3.2	1250	33	NA	0.72	1.17	8.8	10.3	-7	24.7	301.6	3000	1550	99.85	9.71	36.07	34.2	2.3	8	2020	Literatures	Xu et al. (2021)
Planted	Broadleaved	81.1	43.8	1800	1	1	3.2	1250	33	NA	0.72	1.17	8.8	10.3	-7	24.7	301.6	3000	1550	86.46	11.79	44.4	19.78	0.665935	8	2020	Literatures	Xu et al. (2021)
Planted	Broadleaved	81.1	43.8	1800	1	1	3.2	1250	35	NA	0.72	1.17	8.8	10.3	-7	24.7	301.6	3000	1550	62.04	1.4586	35.61	34.2	2.3	8	2020	Literatures	Xu et al. (2021)
Planted	Broadleaved	81.1	43.8	1800	1	1	3.2	1250	35	NA	0.72	1.17	8.8	10.3	-7	24.7	301.6	3000	1550	59.97	1.3211	34.69	19.78	0.665935	8	2020	Literatures	Xu et al. (2021)
Planted	Broadleaved	81.1	43.8	1800	1	1	3.2	1250	37	NA	0.72	1.17	8.8	10.3	-7	24.7	301.6	3000	1550	95.5	10.673	35.95	39.97	1.1	8	2020	Literatures	Xu et al. (2021)
Planted	Broadleaved	81.1	43.8	1800	1	1	3.2	1250	32	NA	0.72	1.17	8.8	10.3	-7	24.7	301.6	3000	1550	72.11	9.973	37.97	36.33	1.1	8	2020	Literatures	Xu et al. (2021)
Planted	Broadleaved	81.1	43.8	1800	1	1	3.2	1250	33	NA	0.72	1.17	8.8	10.3	-7	24.7	301.6	3000	1550	79.33	12.012	37.6	39.97	1.66	8	2020	Literatures	Xu et al. (2021)
Planted	Broadleaved	81.1	43.8	1800	1	1	3.2	1250	35	NA	0.72	1.17	8.8	10.3	-7	24.7	301.6	3000	1550	93.94	10.632	38.89	39.97	1.1	8	2020	Literatures	Xu et al. (2021)
Planted	Broadleaved	81.1	43.8	1800	1	1	3.2	1250	42	NA	0.72	1.17	8.8	10.3	-7	24.7	301.6	3000	1550	66.84	11.89	37.71	39.97	1.66	8	2020	Literatures	Xu et al. (2021)
Planted	Broadleaved	81.1	43.8	1800	1	1	3.2	1250	33	NA	0.72	1.17	8.8	10.3	-7	24.7	301.6	3000	1550	76.85	1.255	35.04	34.2	1.66	8	2020	Literatures	Xu et al. (2021)
Planted	Broadleaved	81.1	43.8	1800	1	1	3.2	1250	33	NA	0.72	1.17	8.8	10.3	-7	24.7	301.6	3000	1550	70.39	12.091	37.13	19.78	0.665935	8	2020	Literatures	Xu et al. (2021)
Planted	Broadleaved	81.1	43.8	1800	1	1	3.2	1250	32	NA	0.72	1.17	8.8	10.3	-7	24.7	301.6	3000	1550	96.5	10.584	35.53	36.33	1.66	8	2020	Literatures	Xu et al. (2021)
Planted	Broadleaved	81.1	43.8	1800	1	1	3.2	1250	37	NA	0.72	1.17	8.8	10.3	-7	24.7	301.6	3000	1550	72.79	10.725	39.83	36.55	1.1	8	2020	Literatures	Xu et al. (2021)
Planted	Broadleaved	81.1	43.8	1800	1	1	3.2	1250	33	NA	0.72	1.17	8.8	10.3	-7	24.7	301.6	3000	1550	71.54	10.535	37.72	36.55	1.1	8	2020	Literatures	Xu et al. (2021)
Planted	Broadleaved	81.1	43.8	1800	1	1	3.2	1250	33	NA	0.72	1.17	8.8	10.3	-7	24.7	301.6	3000	1550	80.76	11.02	38.52	36.33	1.83875	8	2020	Literatures	Xu et al. (2021)
Planted	Broadleaved	81.1	43.8	1800	1	1	3.2	1250	32	NA	0.72	1.17	8.8	10.3	-7	24.7	301.6	3000	1550	72.27	10.17	38.74	36.55	1.83875	8	2020	Literatures	Xu et al. (2021)
Planted	Broadleaved	81.1	43.8	1800	1	1	3.2	1250	33	NA	0.72	1.17	8.8	10.3	-7	24.7	301.6	3000	1550	85.93	10.404	39	19.78	0.665935	8	2020	Literatures	Xu et al. (2021)
Planted	Broadleaved	81.1	43.8	1800	1	1	3.2	1250	35	NA	0.72	1.17	8.8	10.3	-7	24.7	301.6	3000	1550	65.6	1.256	38.09	35.87	1.1	8	2020	Literatures	Xu et al. (2021)
Planted	Broadleaved	81.1	43.8	1800	1	1	3.2	1250	32	NA	0.72	1.17	8.8	10.3	-7	24.7	301.6	3000	1550	83.61	10.516	36.61	19.78	0.665935	8	2020	Literatures	Xu et al. (2021)
Planted	Broadleaved	81.1	43.8	1800	1	1	3.2	1250	33	NA	0.72	1.17	8.8	10.3	-7	24.7	301.6	3000	1550	65.39	9.99	40.36	36.55	2.3	8	2020	Literatures	Xu et al. (2021)
Planted	Broadleaved	81.1	43.8	1800	1	1	3.2	1250	35	NA	0.72	1.17	8.8	10.3	-7	24.7	301.6	3000	1550	87.1	11.239	36.98	36.55	1.83875	8	2020	Literatures	Xu et al. (2021)
Planted	Broadleaved	81.1	43.8	1800	1	1	3.2	1250	32	NA	0.72	1.17	8.8	10.3	-7	24.7	301.6	3000	1550	89.59	9.062	41.32	34.2	1.66	8	2020	Literatures	Xu et al. (2021)
Planted	Broadleaved	81.1	43.8	1800	1	1	3.2	1250	32	NA	0.72	1.17	8.8	10.3	-7	24.7	301.6	3000	1550	89.88	10.186	39.14	36.55	1.66	8	2020	Literatures	Xu et al. (2021)
Planted	Broadleaved	81.1	43.8	1800	1	1	3.2	1250	42	NA	0.72	1.17	8.8	10.3	-7	24.7	301.6	3000	1550	75.72	10.927	38.69	36.33	2.3	8	2020	Literatures	Xu et al. (2021)
Planted	Broadleaved	81.1	43.8	1800	1	1	3.2	1250	42	NA	0.72	1.17	8.8	10.3	-7	24.7	301.6	3000	1550	62.62	11.709	40.71	35.87	1.83875	8	2020	Literatures	Xu et al. (2021)
Planted	Broadleaved	81.1	43.8	1800	1	1	3.2	1250	35	NA	0.72	1.17	8.8	10.3	-7	24.7	301.6	3000	1550	67.05	10.305	39.43	36.55	1.83875	8	2020	Literatures	Xu et al. (2021)
Planted	Broadleaved	81.1	43.8	1800	1	1	3.2	1250	35	NA	0.72	1.17	8.8	10.3	-7	24.7	301.6	3000	1550	65.44	1.4527	36.15	34.2	2.3	8	2020	Literatures	Xu et al. (2021)
Planted	Broadleaved	81.1	43.8	1800	1	1	3.2	1250	33	NA	0.72	1.17	8.8	10.3	-7	24.7	301.6	3000	1550	74.98	11.298	39.32	19.78	0.665935	8	2020	Literatures	Xu et al. (2021)
Planted	Broadleaved	81.1	43.8	1800	1	1	3.2	1250	32	NA	0.72	1.17	8.8	10.3	-7	24.7	301.6	3000	1550	78.44	8.997	39.4	36.55	2.3	8	2020	Literatures	Xu et al. (2021)
Planted	Broadleaved	81.1	43.8	1800	1	1	3.2	1250	37	NA	0.72	1.17	8.8	10.3	-7	24.7	301.6	3000	1550	80.37	11.147	38.18	36.33	1.1	8	2020	Literatures	Xu et al. (2021)
Planted	Broadleaved	81.1	43.8	1800	1	1	3.2	1250	33	NA	0.72	1.17	8.8	10.3	-7	24.7	301.6	3000	1550	87.33	10.274	38.79	36.55	1.83875	8	2020	Literatures	Xu et al. (2021)
Planted	Broadleaved	81.1	43.8	1800	1	1	3.2	1250	42	NA	0.72	1.17	8.8	10.3	-7	24.7	301.6	3000	1550	69.18	12.031	39.7	35.87	1.83875	8	2020	Literatures	Xu et al. (2021)
Planted	Broadleaved	81.1	43.8	1800	1	1	3.2	1250	32	NA	0.72	1.17	8.8	10.3	-7	24.7	301.6	3000	1550	83.75	1.2828	36.32	35.87	1.1	8	2020	Literatures	Xu et al. (2021)
Planted	Broadleaved	82.5	40.8	875	1	40	22.58	500	35	NA	0.964708	8.1112	8.84125	10.4	-11.8	30.8	48.5	3075	1998.4	9.07	8.995	32.1	36.33	1.83875	7	2017	Literatures	Xu et al. (2021)
Planted	Broadleaved	82.5	40.8	875	1	40	22.58	500	37	NA	0.964708	8.1112	8.84125	10.4	-11.8	30.8	48.5	3075	1998.4	9.05	9.003	32.2	19.78	0.665935	7	2017	Literatures	Xu et al. (2021)
Planted	Broadleaved	116.46	39.9	80	1	NA	0.408	500	0	NA	1.98033	9.24798	6.10382	12.1	-5	26	644	2200	1325	89.88	16.2	34	15	0.99	9	2014	Literatures	Gao et al. (2018)
Planted	Broadleaved	116.46	39.9	80	1	NA	0.408	500	0	NA	1.98033	9.24798	6.10382	12.1	-5	26	644	2200	1325	79.33	13.8	32.8	17.2	0.9	9	2014	Literatures	Gao et al. (2018)
Planted	Broadleaved	116.46	39.9	80	1	NA	0.408	500	0	NA	1.98033	9.24798	6.10382	12.1	-5	26	644	2200	1325	83.61	14.2	34.8	19.5	0.94	9	2014	Literatures	Gao et al. (2018)
Planted	Broadleaved	116.46	39.9	80	1	NA	0.408	500	0	NA	1.98033	9.24798	6.10382	12.1	-5	26	644	2200	1325	72.27	14.5	35.1	19.5	0.68	9	2014	Literatures	Gao et al. (2018)
Planted	Broadleaved	102.9	38.6	1380	1	50	18.2	500	32	NA	1.7	0.12	8.42	7.7	-2.5	23.1	115.2	2700	1057	2.8	37	15.35	26.01	1.21	7	2018	Literatures	Zheng et al. (2021)
Planted	Broadleaved	102.9	38.6	1380	1	40	17.14	500	35	NA	0.5	0.65	9.04	7.7	-2.5	23.1	115.2	2700	1057	21	29	17.33	38.21	1.59	7	2018	Literatures	Zheng et al. (2021)
Planted	Broadleaved	102.9	38.6	1380	1	13	22.58	500	33	NA	0.4	0.6	9.03	7.7	-2.5	23.1	115.2	2700	1057	17.7	27	17.4	36.33	1.42	7	2018	Literatures	Zheng et al. (2021)
Planted	Broadleaved	102.9	38.6	1380	1	4	18.2	500	37	NA	0.3	0.9	8.86	7.7	-2.5	23.1	115.2	2700	1057	2.8	30	15.12	37.28	1.67	7	2018	Literatures	Zheng et al. (2021)
Planted	Broadleaved	102.9	38.6	1380	1	50	18.2	500	42	NA	1.7	0.12	8.42	7.7	-2.5	23.1	115.2	2700	1057	17.7	37.1	15.97	26.79	1.24	7	2018	Literatures	Zheng et al. (2021)
Planted	Broadleaved	102.9	38.6	1380	1	40	23.61	500	42	NA	0.5	0.65	9.04	7.7	-2.5	23.1	115.2	2700	1057	21	29.2	18.07	39.97	1.62	7	2018	Literatures	Zheng et al. (2021)
Planted	Broadleaved	102.9	38.6	1380	1	13	23.61	500	42	NA	0.4	0.6	9.03	7.7	-2.5	23.1	115.2	2700	1057	21	27.2	17.87	38.46	1.46	7	2018	Literatures	Zheng et al. (2021)
Planted	Broadleaved	102.9	38.6	1380	1	4	18.2	500	37	NA	0.3	0.9	8.86	7.7	-2.5	23.1	115.2	2700	1057	2.8	30.3	15.8	40.25	1.83	7	2018	Literatures	Zheng et al. (2021)
Planted	Broadleaved	102.9	38.6	1380	1	50	17.14	500	42	NA	1.7	0.12	8.42	7.7	-2.5	23.1	115.2	2700	1057	21	36.9	14.73	25.43	1.18	7	2018	Literatures	Zheng et al. (2021)
Planted	Broadleaved	102.9	38.6	1380	1	40	22.58	500	33	NA	0.5	0.65	9.04	7.7	-2.5	23.1	115.2	2700	1057	43	28.8	16.69	36.55	1.56	7	2018	Literatures	Zheng et al. (2021)
Planted	Broadleaved	102.9	38.6	1380	1	13	18.2	500	33	NA	0.4	0.6	9.03	7.7	-2.5	23.1	115.2	2700	1057	21	26.8	16.93	34.2	1.38	7	2018	Literatures	Zheng et al. (2021)
Planted	Broadleaved	102.9	38.6	1380	1	4	17.14	500	35	NA	0.3	0.9	8.86	7.7	-2.5	23.1	115.2	2700	1057	2.8	29.7	14.47	34.23	1.51	7	2018	Literatures	Zheng et al. (2021)
Planted	Broadleaved	102.9	38.5	1380	1	NA	22.58	500	35	NA	0.8	0.2	9.05	7.7	-2.5	23.1	115.2	2700	1057	43	25	16.4	40.58	1.64	7	2018	Literatures	Zheng et al. (2021)
Planted	Broadleaved	102.8	38.5	1380	1	30	18.2	500	35	NA	0.4	0.6	9.17	7.7	-2.5	23.1	115.2	2700	1057	2.8	20	17.67	32.61	1.47	7	2018	Literatures	Zheng et al. (2021)
Planted	Broadleaved	102.9	38.5	1380	1	NA	22.58	500	42	NA	0.8	0.6	9.05	7.7	-2.5	23.1	115.2	2700	1057	2.8	25.3	16.97	43.48	1.75	7	2018	Literatures	Zheng et al. (2021)
Planted	Broadleaved	102.8	38.5	1380	1	30	22.58	500	35	NA	0.4	0.6	9.17	7.7	-2.5	23.1	115.2	2700	1057	17.7	20.1	18.44	35.87	1.66	7	2018	Literatures	Zheng et al. (2021)
Planted	Broadleaved	102.9	38.5	1380	1	NA	17.14	500	42	NA	0.8	0.2	9.05	7.7	-2.5	23.1	115.2	2700	1057	2.8	24.7	15.83	37.78	1.53	7	2018	Literatures	Zheng et al. (2021)
Planted	Broadleaved	102.8	38.5	1380	1	30	22.58	500	32	NA	0.4	0.6	9.17	7.7	-2.5	23.1	115.2	2700	1057	2.8	19.9	16.9	29.54	1.28	7	2018	Literatures	Zheng et al. (2021)
Planted	Broadleaved	109.33	36.87	1314	1	50	22.63	500	35	N	2.43324	9.16462	6.34732	8.8	-3.2	29.5	505.3	2253.11	1500	6.6	13	17.33	10.8	1.05	7	2014	Literatures	Chai et al. (2018)
Planted	Broadleaved	109.351	36.85	1281	1	30	16.47	500	25	N	2.41009	9.20521	6.3412	8.8	-3.2	29.5	505.3	2250.17	1500	10.5	19	17.33	13.5	1.6	7	2014	Literatures	Chai et al. (2018)
Planted	Broadleaved	109.31	36.85	1086	1	40	19.1083	500	29	N	2.26897	9.40021	6.33213	8.8	-3.2	29.5	505.3	2241.12	1500	8	16	15.97	11.5	1.3	7	2014	Literatures	Chai et al. (2018)
Planted	Broadleaved	109.6	36.83	1278	1	17	4.73	500	0	S	2.41916	9.21581	6.31965	8.8	-5.7	18.9	500	2244.82	1500	70.39	8.38	54.7896	27.63	1.92	8	2014	Literatures	Chai et al. (2018)
Planted	Broadleaved	109.6	36.83	1307	1	20	0.408	500	0	N	2.43986	9.18681	6.32146	8.8	-5.7	18.9	500	2246.27	1500	120	5.57	63	21.35	1.36	8	2014	Literatures	Chai et al. (2018)
Planted	Broadleaved	109.6	36.83	1287	1	19	3.2	500	0	S	2.42558	9.20681	6.32021	8.8	-5.7	18.9	500	2245.27	1500	90	8.28	44	26.78	1.87	8	2014	Literatures	Chai et al. (2018)
Planted	Broadleaved	109.6	36.83	1290	1	23	3.2	500	0	N	2.42772	9.20381	6.3204	8.8	-5.7	18.9	500	2245.42	1500	60	5.62	66.7712	22.34	1.41	8	2014	Literatures	Chai et al. (2018)
Planted	Broadleaved	109.25	36.73	1112	1	10	16.35	500	26	N	2.28113	9.41978	6.32347	8.8	-3.2	29.5	505.3	2237.86	1500	6.3	16	15.97	11.2	1.2	7	2014	Literatures	Chai et al. (2018)
Planted	Broadleaved	109.35	36.66	1280	1	20	19.7452	500	25	N	2.40369	9.27837	6.31773	8.8	-3.2	29.5	505.3	2241.29	1500	7	18	16.69	12.3	1.4	7	2014	Literatures	Chai et al. (2018)
Planted	Broadleaved	103.4	36.03	1500	1	14	3.2	1867	3	NA	2.26	9.29761	6.70503	10.3	-2.3	23.2	327	2324.89	2589	7.9317	17.626	32.61	27.17	1.63	6	2018	Literatures	LI et al. （2020）
Planted	Broadleaved	103.4	36.03	1500	1	17	16	1867	0	NA	2.26	9.29761	6.70503	10.3	-2.3	23.2	327	2324.89	2589	2.3533	18.1023	33.33	21.35	1.1	6	2018	Literatures	LI et al. （2020）
Planted	Broadleaved	103.4	36.03	1500	1	19	9.4	1867	0	NA	2.26	9.29761	6.70503	10.3	-2.3	23.2	327	2324.89	2589	1.8533	6.39069	42.65	22.92	1.66	6	2018	Literatures	LI et al. （2020）
Planted	Broadleaved	103.4	36.03	1500	1	14	12	2610	0	NA	2.26	9.29761	6.70503	10.3	-2.3	23.2	327	2324.89	2589	11.12	7.31579	40.97	27.57	2.3	6	2018	Literatures	LI et al. （2020）
Planted	Broadleaved	103.4	36.03	1500	1	11	10	1867	0	NA	2.26	9.29761	6.70503	10.3	-2.3	23.2	327	2324.89	2589	14.2	17.1084	57.24	21.35	1.66	6	2018	Literatures	LI et al. （2020）
Planted	Broadleaved	103.4	36.03	1500	1	16	12.37	2610	0	NA	2.26	9.29761	6.70503	10.3	-2.3	23.2	327	2324.89	2589	20.7467	13.924	29.62	25.43	1.66	6	2018	Literatures	LI et al. （2020）
Planted	Broadleaved	103.4	36.03	1500	1	17	10	2610	0	NA	2.26	9.29761	6.70503	10.3	-2.3	23.2	327	2324.89	2589	33.64	11.7622	30.01	27.57	1.83875	6	2018	Literatures	LI et al. （2020）
Planted	Broadleaved	103.4	36.03	1500	1	17	8	1867	3	NA	2.26	9.29761	6.70503	10.3	-2.3	23.2	327	2324.89	2589	8.8667	16.4198	33.33	22.92	1.1	6	2018	Literatures	LI et al. （2020）
Planted	Broadleaved	103.4	36.03	1500	1	19	16	1867	0	NA	2.26	9.29761	6.70503	10.3	-2.3	23.2	327	2324.89	2589	0.7333	14.666	55.56	27.17	1.83875	6	2018	Literatures	LI et al. （2020）
Planted	Broadleaved	103.4	36.03	1500	1	14	12	1867	4	NA	2.26	9.29761	6.70503	10.3	-2.3	23.2	327	2324.89	2589	32.75	13.4726	33.51	22.92	1.83875	6	2018	Literatures	LI et al. （2020）
Planted	Broadleaved	103.4	36.03	1500	1	14	12.37	2610	0	NA	2.26	9.29761	6.70503	10.3	-2.3	23.2	327	2324.89	2589	82.8733	17.0521	29.05	23.8	1.1	6	2018	Literatures	LI et al. （2020）
Planted	Broadleaved	103.4	36.03	1500	1	16	3.73	1867	0	NA	2.26	9.29761	6.70503	10.3	-2.3	23.2	327	2324.89	2589	10.9067	11.7276	41.15	21.35	2.3	6	2018	Literatures	LI et al. （2020）
Planted	Broadleaved	103.4	36.03	1500	1	14	12.37	1867	0	NA	2.26	9.29761	6.70503	10.3	-2.3	23.2	327	2324.89	2589	25.7133	12.303	44	22.92	1.1	6	2018	Literatures	LI et al. （2020）
Planted	Broadleaved	103.4	36.03	1500	1	17	16	1867	0	NA	2.26	9.29761	6.70503	10.3	-2.3	23.2	327	2324.89	2589	29.8667	17.3644	33.2	23.8	1.83875	6	2018	Literatures	LI et al. （2020）
Planted	Broadleaved	103.4	36.03	1500	1	17	12.37	2610	0	NA	2.26	9.29761	6.70503	10.3	-2.3	23.2	327	2324.89	2589	44.34	12.8522	38.46	23.8	1.1	6	2018	Literatures	LI et al. （2020）
Planted	Broadleaved	103.4	36.03	1500	1	14	3.2	2610	0	NA	2.26	9.29761	6.70503	10.3	-2.3	23.2	327	2324.89	2589	9.4467	11.6626	39.32	21.35	1.83875	6	2018	Literatures	LI et al. （2020）
Planted	Broadleaved	103.4	36.03	1500	1	14	12	1867	0	NA	2.26	9.29761	6.70503	10.3	-2.3	23.2	327	2324.89	2589	26.99	18.784	32.8	27.17	1.1	6	2018	Literatures	LI et al. （2020）
Planted	Broadleaved	103.4	36.03	1500	1	17	12	1867	0	NA	2.26	9.29761	6.70503	10.3	-2.3	23.2	327	2324.89	2589	15.8133	13.6322	44.11	27.57	1.83875	6	2018	Literatures	LI et al. （2020）
Planted	Broadleaved	103.4	36.03	1500	1	17	12	1867	4	NA	2.26	9.29761	6.70503	10.3	-2.3	23.2	327	2324.89	2589	26.28	14.8826	39.97	23.8	1.66	6	2018	Literatures	LI et al. （2020）
Planted	Broadleaved	103.4	36.03	1500	1	18	12	1867	0	NA	2.26	9.29761	6.70503	10.3	-2.3	23.2	327	2324.89	2589	159.607	19.4642	38.88	26.79	1.63	6	2018	Literatures	LI et al. （2020）
Planted	Broadleaved	103.4	36.03	1500	1	16	3.96	1867	0	NA	2.26	9.29761	6.70503	10.3	-2.3	23.2	327	2324.89	2589	18.3267	10.1815	49.05	27.17	1.83875	6	2018	Literatures	LI et al. （2020）
Planted	Broadleaved	103.4	36.03	1500	1	19	12.95	1867	0	NA	2.26	9.29761	6.70503	10.3	-2.3	23.2	327	2324.89	2589	68.7267	10.273	42.58	27.57	1.66	6	2018	Literatures	LI et al. （2020）
Planted	Broadleaved	103.4	36.03	1500	1	17	12.37	1867	0	NA	2.26	9.29761	6.70503	10.3	-2.3	23.2	327	2324.89	2589	18.5467	28.9792	34.78	27.17	1.66	6	2018	Literatures	LI et al. （2020）
Planted	Broadleaved	103.4	36.03	1500	1	16	3.2	1867	0	NA	2.26	9.29761	6.70503	10.3	-2.3	23.2	327	2324.89	2589	14.6267	17.8374	32.28	27.17	1.1	6	2018	Literatures	LI et al. （2020）
Planted	Broadleaved	103.4	36.03	1500	1	17	16	1867	0	NA	2.26	9.29761	6.70503	10.3	-2.3	23.2	327	2324.89	2589	4.48	13.1765	36.56	23.8	1.1	6	2018	Literatures	LI et al. （2020）
Planted	Broadleaved	103.4	36.03	1500	1	11	8	1867	4	NA	2.26	9.29761	6.70503	10.3	-2.3	23.2	327	2324.89	2589	15.52	16.5106	53.71	27.57	1.1	6	2018	Literatures	LI et al. （2020）
Planted	Broadleaved	103.4	36.03	1500	1	19	13.63	1867	0	NA	2.26	9.29761	6.70503	10.3	-2.3	23.2	327	2324.89	2589	68.7333	13.4771	36.88	21.35	1.83875	6	2018	Literatures	LI et al. （2020）
Planted	Broadleaved	103.4	36.03	1500	1	17	16	1867	0	NA	2.26	9.29761	6.70503	10.3	-2.3	23.2	327	2324.89	2589	30.82	19.6306	40.46	21.35	0.665935	6	2018	Literatures	LI et al. （2020）
Planted	Broadleaved	103.4	36.03	1500	1	11	3.73	1867	0	NA	2.26	9.29761	6.70503	10.3	-2.3	23.2	327	2324.89	2589	40.6067	17.2795	36.49	27.17	1.1	6	2018	Literatures	LI et al. （2020）
Planted	Broadleaved	103.4	36.03	1500	1	14	12	1867	0	NA	2.26	9.29761	6.70503	10.3	-2.3	23.2	327	2324.89	2589	2.9933	11.9732	67.57	27.17	1.63	6	2018	Literatures	LI et al. （2020）
Planted	Broadleaved	103.4	36.03	1500	1	14	12.37	1867	0	NA	2.26	9.29761	6.70503	10.3	-2.3	23.2	327	2324.89	2589	84.3867	11.7367	43.16	27.57	1.63	6	2018	Literatures	LI et al. （2020）
Planted	Broadleaved	103.4	36.03	1500	1	17	16	1867	0	NA	2.26	9.29761	6.70503	10.3	-2.3	23.2	327	2324.89	2589	24.8067	14.0947	57.52	27.17	1.66	6	2018	Literatures	LI et al. （2020）
Planted	Broadleaved	103.4	36.03	1500	1	14	12.37	1867	0	NA	2.26	9.29761	6.70503	10.3	-2.3	23.2	327	2324.89	2589	52.2867	16.4942	43.37	21.35	0.665935	6	2018	Literatures	LI et al. （2020）
Planted	Broadleaved	103.4	36.03	1500	1	11	10	1867	0	NA	2.26	9.29761	6.70503	10.3	-2.3	23.2	327	2324.89	2589	33.9133	14.6178	54.33	21.35	1.1	6	2018	Literatures	LI et al. （2020）
Planted	Broadleaved	103.4	36.03	1500	1	16	9.4	2610	0	NA	2.26	9.29761	6.70503	10.3	-2.3	23.2	327	2324.89	2589	16.52	18.5618	35.46	22.92	0.665935	6	2018	Literatures	LI et al. （2020）
Planted	Broadleaved	103.4	36.03	1500	1	14	12	2610	0	NA	2.26	9.29761	6.70503	10.3	-2.3	23.2	327	2324.89	2589	37.5733	12.5244	49.92	23.8	1.83875	6	2018	Literatures	LI et al. （2020）
Planted	Broadleaved	103.4	36.03	1500	1	17	16	1867	0	NA	2.26	9.29761	6.70503	10.3	-2.3	23.2	327	2324.89	2589	9.0533	27.4342	48.53	23.8	2.3	6	2018	Literatures	LI et al. （2020）
Planted	Broadleaved	103.4	36.03	1500	1	14	16	1867	0	NA	2.26	9.29761	6.70503	10.3	-2.3	23.2	327	2324.89	2589	49.7133	25.6254	36.06	27.17	1.83875	6	2018	Literatures	LI et al. （2020）
Planted	Broadleaved	103.4	36.03	1500	1	14	16	1867	0	NA	2.26	9.29761	6.70503	10.3	-2.3	23.2	327	2324.89	2589	40.0133	10.4747	36.42	27.17	1.1	6	2018	Literatures	LI et al. （2020）
Planted	Broadleaved	103.4	36.03	1500	1	19	12.37	2610	0	NA	2.26	9.29761	6.70503	10.3	-2.3	23.2	327	2324.89	2589	24.7867	12.3317	41.96	22.92	1.66	6	2018	Literatures	LI et al. （2020）
Planted	Broadleaved	103.4	36.03	1500	1	17	14	1867	0	NA	2.26	9.29761	6.70503	10.3	-2.3	23.2	327	2324.89	2589	80.1733	12.1659	41.55	25.43	0.71	6	2018	Literatures	LI et al. （2020）
Planted	Broadleaved	103.4	36.03	1500	1	17	3.2	1867	3	NA	2.26	9.29761	6.70503	10.3	-2.3	23.2	327	2324.89	2589	14.3667	16.5134	39.55	21.35	0.665935	6	2018	Literatures	LI et al. （2020）
Planted	Broadleaved	103.4	36.03	1500	1	20	8	1867	3	NA	2.26	9.29761	6.70503	10.3	-2.3	23.2	327	2324.89	2589	6.84	22.0645	40.79	22.92	1.83875	6	2018	Literatures	LI et al. （2020）
Planted	Broadleaved	103.4	36.03	1500	1	17	9.4	2610	0	NA	2.26	9.29761	6.70503	10.3	-2.3	23.2	327	2324.89	2589	9.5267	12.0591	48.17	23.8	1.1	6	2018	Literatures	LI et al. （2020）
Planted	Broadleaved	103.4	36.03	1500	1	16	12.37	1867	0	NA	2.26	9.29761	6.70503	10.3	-2.3	23.2	327	2324.89	2589	20.5933	15.0316	38.59	27.17	1.83875	6	2018	Literatures	LI et al. （2020）
Planted	Broadleaved	103.4	36.03	1500	1	17	3.2	1867	0	NA	2.26	9.29761	6.70503	10.3	-2.3	23.2	327	2324.89	2589	16.42	16.7551	38.89	27.57	1.63	6	2018	Literatures	LI et al. （2020）
Planted	Broadleaved	103.4	36.03	1500	1	17	16	1867	4	NA	2.26	9.29761	6.70503	10.3	-2.3	23.2	327	2324.89	2589	23.4933	19.7423	39.93	21.35	2.3	6	2018	Literatures	LI et al. （2020）
Planted	Broadleaved	105.04	36.03	2025	1	18	3.96	500	20	S	2.71243	8.77261	6.61338	7.9	-3.1	20.8	315	2323.05	1800	20.4	18.37	24	19.5	2.5851	8	2017	Literatures	Chai et al. (2018)
Planted	Broadleaved	105.04	36.03	2025	1	18	3.73	500	17.5	N	2.71243	8.77261	6.61338	7.9	-3.1	20.8	315	2323.05	1800	20.83	16.81	27	11.1	1.83144	8	2017	Literatures	Chai et al. (2019)
Planted	Broadleaved	105.04	36.03	2025	1	14	3.2	500	17.5	NA	2.71243	8.77261	6.61338	7.9	-3.1	20.8	315	2323.05	1800	20.39	18.4	25.1	32	1.51	8	2017	Literatures	Chai et al. (2020)
Planted	Broadleaved	105.04	36.03	2025	1	17	3.2	500	23	NA	2.71243	8.77261	6.61338	7.9	-3.1	20.8	315	2323.05	1800	20.34	17.08	26.1	11.1	1.12455	8	2017	Literatures	Chai et al. (2021)
Planted	Broadleaved	105.04	36.03	2025	1	17	3.2	500	28	NA	2.71243	8.77261	6.61338	7.9	-3.1	20.8	315	2323.05	1800	21.14	17.8	24.1	18.2226	1.66025	8	2017	Literatures	Chai et al. (2022)
Planted	Broadleaved	116.6	30.5	1400	1	14	23.61	500	42	NA	0.11	1.2	4.85	15.4	3.2	22.4	1436	1916.6	917.4	0.7391	42.7583	33.9598	10.9	1.04	7	2016	Literatures	Chai et al. (2023)
Planted	Broadleaved	116.6	30.5	1400	1	14	22.58	500	33	NA	0.11	1.2	4.85	15.4	3.2	22.4	1436	1916.6	917.4	31.66	29	52.17	11.1	1.07	7	2016	Literatures	Chai et al. (2024)
Planted	Broadleaved	120.16	30.18	1	5	13	13.63	500	0	NA	1.81113	13.0181	4.61677	16.4	6.4	31.4	1628	1690.59	1846.5	18.29	12.04	16.69	18.18	0.72	7	2013	Literatures	Hu et al. (2015)
Planted	Broadleaved	120.16	30.18	1	5	20	16.35	500	0	NA	1.81113	13.0181	4.61677	16.4	6.4	31.4	1628	1690.59	1846.5	10.65	14.86	15.35	8.626	0.58	7	2013	Literatures	Hu et al. (2015)
Planted	Broadleaved	120.16	30.18	1	5	33	9.87261	500	0	NA	1.81113	13.0181	4.61677	16.4	6.4	31.4	1628	1690.59	1846.5	12.62	10.37	15.97	11.748	0.63	7	2013	Literatures	Hu et al. (2015)
Planted	Broadleaved	120.16	30.18	1	5	33	13.08	500	0	NA	1.81113	13.0181	4.61677	16.4	6.4	31.4	1628	1690.59	1846.5	15.25	14.11	15.97	18.18	0.58	7	2013	Literatures	Hu et al. (2015)
Planted	Broadleaved	120.16	30.18	1	5	26	16.5605	500	0	NA	1.81113	13.0181	4.61677	16.4	6.4	31.4	1628	1690.59	1846.5	72.73	7.12	15.97	10.9	1.1	7	2013	Literatures	Hu et al. (2015)
Planted	Broadleaved	106.429	29.822	249	6	20	9.4	500	11	NA	1.32667	12.9061	5.62978	13.6	2.3	20.8	1143	1921.54	874	26.98	18.5	34	23.8	1.66	7	2010	Literatures	Hu et al. (2015)
Planted	Broadleaved	119.4	29.8	3.2	1	19	0.408	500	0	NA	1.76541	13.1602	4.6276	18.4	4.3	28.4	1378.5	1686.03	1534.2	72.27	11.61	31.5646	17.84	1.64	8	2011	Literatures	Hu et al. (2015)
Planted	Broadleaved	119.4	29.8	3.2	1	14	0.408	500	0	NA	1.76541	13.1602	4.6276	18.4	4.3	28.4	1378.5	1686.03	1534.2	72.27	9.08	36.56	15.34	1.6	8	2011	Literatures	Hu et al. (2015)
Planted	Broadleaved	119.4	29.8	3.2	6	23	3.2	500	0	NA	1.76541	13.1602	4.6276	18.4	4.3	28.4	1378.5	1686.03	1534.2	78.49	13.01	15.12	18.18	0.92	8	2011	Literatures	Hu et al. (2015)
Planted	Broadleaved	119.62	29.12	18	2	33	3.73	500	0	NA	1.76624	13.4037	4.52779	17	6.5	32.2	1414	1651.35	1587	17.8	17.2	15.97	11.6	0.37	9	2018	Literatures	Hu et al. (2015)
Planted	Broadleaved	119.62	29.12	18	2	33	3.96	500	0	NA	1.76624	13.4037	4.52779	17	6.5	32.2	1414	1651.35	1587	17.4	16.3	14.73	11.6	0.37	9	2018	Literatures	Hu et al. (2015)
Planted	Broadleaved	114.62	27.66	167.8	1	14	12	876	0	NA	1.59287	13.8083	4.73604	16.8	2.9	30.8	1590.9	1676.55	1876.4	62.04	8.5	26.2	16.1	1.41	7	2014	Literatures	Hu et al. (2015)
Planted	Broadleaved	114.62	27.66	167.8	1	17	3.73	876	0	NA	1.59287	13.8083	4.73604	16.8	2.9	30.8	1590.9	1676.55	1876.4	90	7.7	28.3	17.4	1.83	7	2014	Literatures	Hu et al. (2015)
Planted	Broadleaved	114.62	27.66	167.8	1	14	3.2	876	0	NA	1.59287	13.8083	4.73604	16.8	2.9	30.8	1590.9	1676.55	1876.4	60	9.9	28.1	20.3	1.68	7	2014	Literatures	Hu et al. (2015)
Planted	Coniferous	128.1	42.4	853	1	16	38.6	625	4	E	3.24624	12.1286	5.96	3.3	-16.5	20.5	750	2200	1200	5.595	4.0375	38.1	24.53	1.1	6	2018	Literatures	Hu et al. (2015)
Natural	Coniferous	87.46	43.48	2110	1	37.5	61.4	1600	41.5	NA	2.16069	5.85847	8.87331	2	-11.5	15.8	562	2975.17	1478.4	22.5	4.46	47	10.95	1.49	10	2008	Literatures	Hu et al. (2015)
Planted	Coniferous	87.46	43.48	2240	1	17	50.7	1267	30	NA	2.25347	5.72847	8.88143	2	-11.5	15.8	562	2981.67	1478.4	18.9	15.1733	50	24.53	0.665935	6	2018	Literatures	Hu et al. (2015)
Planted	Coniferous	87.46	43.48	2045	1	17	50.7	2000	30	NA	2.1143	5.92347	8.86925	2	-11.5	15.8	562	2971.92	1478.4	17.1	3.8	38	8	0.4	7	2018	Literatures	Hu et al. (2015)
Natural	Coniferous	87.46	43.48	1962	1	42	38.6	1267	35	NA	2.05507	6.00647	8.86406	2	-11.5	15.8	562	2967.77	1478.4	16.3	4.18	47	9.81	1.25	10	2008	Literatures	Hu et al. (2015)
Natural	Coniferous	87.46	43.48	1850	1	37.5	43.8	2000	41.5	NA	1.97513	6.11847	8.85707	2	-11.5	15.8	562	2962.17	1478.4	14.8	3.5	51	8.69	1.88	10	2008	Literatures	Hu et al. (2015)
Planted	Coniferous	87.46	43.48	2300	1	14	43.6	1267	41.5	NA	2.2963	5.66847	8.88517	2	-11.5	15.8	562	2984.67	1478.4	14.8	5.33556	40.91	27.17	2.3	6	2018	Literatures	Hu et al. (2015)
Planted	Coniferous	87.46	43.48	1757	1	33	61.4	2000	30	NA	1.90876	6.21147	8.85126	2	-11.5	15.8	562	2957.52	1478.4	14.3	13.28	41.8	13.3	1.18	5	2018	Literatures	Hu et al. (2015)
Planted	Coniferous	87.46	43.48	1622	1	33	61.4	1267	35	NA	1.81241	6.34647	8.84283	2	-11.5	15.8	562	2950.77	1478.4	14.2	13.3	40.7	13.7	1.12	5	2018	Literatures	Hu et al. (2015)
Planted	Broadleaved	117.6	26.7	160	1	6	8	1867	18	WN	0.9	22	5.05	18.5	5.4	22.4	1800	1796	775	5.02	36.9	36.3019	24.52	1.1	7	2015	Literatures	Hu et al. (2015)
Planted	Broadleaved	117.6	26.7	160	1	6	10	1867	18	WN	0.9	22	5.05	18.5	5.4	22.4	1800	1796	775	5.67	39.39	36.3019	24.53	1.18	7	2015	Literatures	Hu et al. (2015)
Planted	Broadleaved	117.6	26.7	160	1	6	12	1867	18	WN	0.9	22	5.05	18.5	5.4	22.4	1800	1796	775	7.33	42.67	66.7712	27.57	1.41	7	2015	Literatures	Hu et al. (2015)
Planted	Broadleaved	117.6	26.7	160	1	6	14	1867	18	WN	0.9	22	5.05	18.5	5.4	22.4	1800	1796	775	8.47	33.346	36.3019	27.17	1.36	7	2015	Literatures	Hu et al. (2015)
Planted	Broadleaved	117.6	26.7	160	1	6	16	1867	18	WN	0.9	22	5.05	18.5	5.4	22.4	1800	1796	775	8.83	33.85	66.7712	22.92	1.24	7	2015	Literatures	Hu et al. (2015)
Planted	Broadleaved	111.5	26.2	650	1	13	12.6	901	0	NA	1.74584	13.8805	4.82241	18	5.2	34.2	1745	1686.15	1934	11.68	13.176	14.73	15.9	1.43	7	2017	Literatures	Hu et al. (2015)
Planted	Broadleaved	111.5	26.2	650	1	12	9.4	2610	0	NA	1.74584	13.8805	4.82241	18	5.2	34.2	1745	1686.15	1934	13.64	14.296	16.69	19.5	1.06	7	2017	Literatures	Hu et al. (2015)
Planted	Broadleaved	102.91	25.7	2100	1	1	23.61	500	33	NA	2.35871	12.6204	5.50288	15	5.6	20.8	1035	1882.53	879	118.26	28.156	23	23.8	1.1	8	2018	Literatures	Song et al. （2021）
Planted	Broadleaved	102.91	25.7	2100	1	1	24.94	500	32	NA	2.35871	12.6204	5.50288	15	5.6	20.8	1035	1882.53	879	60.7	12.295	38	23.8	2.3	8	2018	Literatures	Song et al. （2021）
Planted	Broadleaved	102.91	25.7	2100	2	1	21.03	500	42	NA	2.35871	12.6204	5.50288	15	5.6	20.8	1035	1882.53	879	48.73	17.873	32	23.8	1.83875	8	2018	Literatures	Song et al. （2021）
Planted	Broadleaved	102.91	25.7	2100	5	1	17.14	500	35	NA	2.35871	12.6204	5.50288	15	5.6	20.8	1035	1882.53	879	17.7	17.111	31	22.92	2.5851	8	2018	Literatures	Song et al. （2021）
Planted	Broadleaved	102.91	25.7	2100	2	1	18.28	500	37	NA	2.35871	12.6204	5.50288	15	5.6	20.8	1035	1882.53	879	20.31	9.521	40	22.92	2.3	8	2018	Literatures	Song et al. （2021）
Planted	Broadleaved	102.91	25.7	2100	2	1	17.43	500	33	NA	2.35871	12.6204	5.50288	15	5.6	20.8	1035	1882.53	879	10.89	5.346	42	27.57	1.97691	8	2018	Literatures	Song et al. （2021）
Planted	Broadleaved	102.91	25.7	2100	2	1	28.75	500	33	NA	2.35871	12.6204	5.50288	15	5.6	20.8	1035	1882.53	879	24.49	11.844	46	25.43	1.66	8	2018	Literatures	Song et al. （2021）
Planted	Broadleaved	102.91	25.7	2100	1	1	25.05	500	33	NA	2.35871	12.6204	5.50288	15	5.6	20.8	1035	1882.53	879	15.78	6.213	44	37.78	2.3	8	2018	Literatures	Song et al. （2021）
Planted	Broadleaved	102.91	25.7	2100	1	1	12.57	500	37	NA	2.35871	12.6204	5.50288	15	5.6	20.8	1035	1882.53	879	29.67	7.916	30	26.79	0.988996	8	2018	Literatures	Song et al. （2021）
Planted	Broadleaved	102.91	25.7	2100	1	1	6.24	500	33	NA	2.35871	12.6204	5.50288	15	5.6	20.8	1035	1882.53	879	43.3	7.553	31	21.35	1.88736	8	2018	Literatures	Song et al. （2021）
Planted	Broadleaved	102.91	25.7	2100	1	1	4.77	500	35	NA	2.35871	12.6204	5.50288	15	5.6	20.8	1035	1882.53	879	15.16	15.676	50	19.5	1.07	8	2018	Literatures	Song et al. （2021）
Planted	Broadleaved	102.91	25.7	2100	1	1	8.53	500	32	NA	2.35871	12.6204	5.50288	15	5.6	20.8	1035	1882.53	879	41.49	10.927	15	17.2	0.87387	8	2018	Literatures	Song et al. （2021）
Planted	Broadleaved	102.91	25.7	2100	1	1	16.47	500	35	NA	2.35871	12.6204	5.50288	15	5.6	20.8	1035	1882.53	879	76.78	13.66	57	26.78	1.99979	8	2018	Literatures	Song et al. （2021）
Planted	Broadleaved	102.91	25.7	2100	1	1	10.67	500	33	NA	2.35871	12.6204	5.50288	15	5.6	20.8	1035	1882.53	879	16.96	15.947	46	15.9	1.63705	8	2018	Literatures	Song et al. （2021）
Planted	Broadleaved	102.91	25.7	2100	1	1	5.53	500	37	NA	2.35871	12.6204	5.50288	15	5.6	20.8	1035	1882.53	879	9.35	26.444	29	19.5	1.4	8	2018	Literatures	Song et al. （2021）
Planted	Broadleaved	102.91	25.7	2100	1	1	19.03	500	32	NA	2.35871	12.6204	5.50288	15	5.6	20.8	1035	1882.53	879	12.28	28.169	32	27.63	1.73491	8	2018	Literatures	Song et al. （2021）
Planted	Broadleaved	102.91	25.7	2100	1	1	22.63	500	37	NA	2.35871	12.6204	5.50288	15	5.6	20.8	1035	1882.53	879	70.78	6.155	42	22.92	1.66	8	2018	Literatures	Song et al. （2021）
Planted	Broadleaved	102.91	25.7	2100	1	1	22.05	500	33	NA	2.35871	12.6204	5.50288	15	5.6	20.8	1035	1882.53	879	9.33	10.137	63	27.17	2.15052	8	2018	Literatures	Song et al. （2021）
Planted	Broadleaved	102.91	25.7	2100	1	1	14.44	500	37	NA	2.35871	12.6204	5.50288	15	5.6	20.8	1035	1882.53	879	22.32	8.55	54	24.52	2.09513	8	2018	Literatures	Song et al. （2021）
Planted	Broadleaved	102.91	25.7	2100	1	1	19.33	500	35	NA	2.35871	12.6204	5.50288	15	5.6	20.8	1035	1882.53	879	21.52	6.073	55	26.78	2.38575	8	2018	Literatures	Song et al. （2021）
Planted	Broadleaved	102.91	25.7	2100	1	1	14.47	500	33	NA	2.35871	12.6204	5.50288	15	5.6	20.8	1035	1882.53	879	35.42	13.124	47	24.52	1.59868	8	2018	Literatures	Song et al. （2021）
Planted	Broadleaved	102.91	25.7	2100	1	1	26.33	500	35	NA	2.35871	12.6204	5.50288	15	5.6	20.8	1035	1882.53	879	47.23	10.827	39	19.5	2.3	8	2018	Literatures	Song et al. （2021）
Planted	Broadleaved	102.91	25.7	2100	1	1	19.57	500	37	NA	2.35871	12.6204	5.50288	15	5.6	20.8	1035	1882.53	879	40.43	9.659	49	19.5	0.992952	8	2018	Literatures	Song et al. （2021）
Planted	Broadleaved	102.91	25.7	2100	1	1	16.92	500	35	NA	2.35871	12.6204	5.50288	15	5.6	20.8	1035	1882.53	879	27.71	11.594	53	32.61	2.3843	8	2018	Literatures	Song et al. （2021）
Planted	Coniferous	87.46	43.48	1505	1	33	50.7	1267	35	NA	1.7289	6.46347	8.83553	2	-11.5	15.8	562	2944.92	1478.4	13.5	13.35	41.5	13.1	1.15	5	2018	Literatures	Song et al. （2021）
Natural	Coniferous	87.46	43.48	1420	1	5	38.6	2000	30	NA	1.66824	6.54847	8.83022	2	-11.5	15.8	562	2940.67	1478.4	13	5	58	12.5	1.1	8	2010	Literatures	Song et al. （2021）
Natural	Coniferous	127.73	43.95	475	1	25	34.2	1267	24	NA	2.91653	7.31499	5.77401	3.8	-18.6	21.7	750	2225.47	435	10.6	5	58	12.5	1.1	8	2010	Literatures	Song et al. （2021）
Planted	Broadleaved	117.414	23.648	7	1	17	18.2	1500	3	NA	1.49158	15.4927	4.01813	20.8	6.9	32.5	1945	1433.93	1056	13.2	9.5	32	32	1.34	7	2018	Literatures	Song et al. （2021）
Planted	Broadleaved	117.403	23.638	5	1	17	17.4	1650	3	NA	1.48934	15.4985	4.0176	20.8	6.9	32.5	1945	1433.55	1056	42.3	9.6	31	17.2	0.85	7	2018	Literatures	Song et al. （2021）
Planted	Broadleaved	117.42	23.513	3	1	11	16.4	2250	4	NA	1.48501	15.5479	4.00074	20.8	6.9	32.5	1945	1427.34	1056	2.8	6.1	43	15	0.5	7	2018	Literatures	Song et al. （2021）
Natural	Coniferous	127.73	43.95	475	1	37.5	34.2	1267	18	NA	2.91653	7.31499	5.77401	3.8	-18.6	21.7	750	2225.47	435	8.9	5	58	12.5	1.1	8	2010	Literatures	Song et al. （2021）
Planted	Broadleaved	113.35	23.2	100	6	17	13.5	500	0	NA	1.5	15.2	5.3	21.2	6.8	28.6	1706	1300	893	16.09	15.2	60.0204	19.2	1.3	8	2017	Literatures	He et al. (2019)
Planted	Broadleaved	113.35	23.2	100	6	19	15	500	0	NA	1.5	15.2	5.3	21.2	6.8	28.6	1706	1300	893	33.84	17.5	25.5	18.5	1.38	8	2017	Literatures	He et al. (2019)
Planted	Broadleaved	113.35	23.2	100	6	17	11.6	500	0	NA	1.5	15.2	5.3	21.2	6.8	28.6	1706	1300	893	25.26	24.7	20.2073	20.7	1.32	8	2017	Literatures	He et al. (2019)
Planted	Broadleaved	113.35	23.2	100	6	19	17.37	500	0	NA	1.5	15.2	5.3	21.2	6.8	28.6	1706	1300	893	20.7467	7.6	28.3133	11.6	0.85	8	2017	Literatures	He et al. (2019)
Planted	Broadleaved	113.35	23.2	100	6	16	5.75	500	0	NA	1.5	15.2	5.3	21.2	6.8	28.6	1706	1300	893	11.68	11.7	25.9843	10.4	0.58	8	2017	Literatures	He et al. (2019)
Planted	Broadleaved	113.35	23.2	100	6	32	19.2	500	0	NA	1.5	15.2	5.3	21.2	6.8	28.6	1706	1300	893	49.7133	7.2	26.4463	10.2	0.54	8	2017	Literatures	He et al. (2019)
Planted	Coniferous	127.73	43.95	475	1	14	34.2	1267	20	NA	2.91653	7.31499	5.77401	3.8	-18.6	21.7	750	2225.47	435	8	5.10526	42.7	21.35	1.1	6	2018	Literatures	He et al. (2019)
Planted	Coniferous	121.3	49.6	840	1	26	29	1267	5	ES	1.23126	20	8.2	1.3	-10.5	14.3	378.5	2550	1917.4	9.5	12.7	44.1	11.9	1.21	5	2018	Literatures	He et al. (2019)
Planted	Coniferous	122.05	49.72	940	1	26	23.9	1267	21	ES	1.23126	20	8.2	1.3	-10.5	14.3	378.5	2550	1917.4	11.16	12.5	43.7	11.6	1.16	5	2018	Literatures	He et al. (2019)
Planted	Broadleaved	107	23	550	1	1	0.408	876	0	NA	1.36628	15.1958	4.76206	21.5	13.1	27.8	1296	1500	1572	78	5.7	36.2	15.9	2.31779	8	2019	Literatures	Peng et al. (2019)
Planted	Broadleaved	107	23	550	1	1	0.408	876	0	NA	1.36628	15.1958	4.76206	21.5	13.1	27.8	1296	1500	1572	24.2	7.3	30.2	15	1.15	8	2019	Literatures	Peng et al. (2019)
Planted	Broadleaved	107	23	550	1	1	0.408	876	0	NA	1.36628	15.1958	4.76206	21.5	13.1	27.8	1296	1500	1572	115	11	28.4	32	1.05	8	2019	Literatures	Peng et al. (2019)
Planted	Broadleaved	107	23	550	1	1	0.408	876	0	NA	1.36628	15.1958	4.76206	21.5	13.1	27.8	1296	1500	1572	89.2	11.4	32.4	17.2	2.04141	8	2019	Literatures	Peng et al. (2019)
Planted	Broadleaved	107	23	550	2	1	4.73	876	0	NA	1.36628	15.1958	4.76206	21.5	13.1	27.8	1296	1500	1572	48.3	8.7	36.8	15	1.75	8	2019	Literatures	Peng et al. (2019)
Planted	Broadleaved	107.8	22.8	79	1	1	8.53	500	33	NA	1.06212	15.7427	4.64723	21.6	12.8	28.2	1304	1500	876	22.38	16.3	32	11	1.07	7	2018	Literatures	Peng et al. (2019)
Planted	Broadleaved	107.8	22.8	79	1	17	23.61	1025	33	NA	1.06212	15.7427	4.64723	21.6	12.8	28.2	1304	1500	876	43	12.8	31	10.8	0.48	1	2019	Literatures	Peng et al. (2019)
Planted	Broadleaved	107.8	22.8	79	1	1	8.9172	500	33	NA	1.06212	15.7427	4.64723	21.6	12.8	28.2	1304	1500	876	21.52	11.8	31	14.2	0.91	7	2018	Literatures	Peng et al. (2019)
Planted	Broadleaved	107.8	22.8	79	1	17	18.2	1500	33	NA	1.06212	15.7427	4.64723	21.6	12.8	28.2	1304	1500	876	21	8.7	37	17.3	0.76	1	2019	Literatures	Peng et al. (2019)
Planted	Broadleaved	107.8	22.8	79	1	7	13.5	500	33	NA	1.06212	15.7427	4.64723	21.6	12.8	28.2	1304	1500	876	24.91	10.9	58	9.8	0.46	7	2018	Literatures	Peng et al. (2019)
Planted	Broadleaved	107.8	22.8	79	1	19	22.58	1025	32	NA	1.06212	15.7427	4.64723	21.6	12.8	28.2	1304	1500	876	17.7	6.7	39	10.3	0.37	1	2019	Literatures	Peng et al. (2019)
Planted	Broadleaved	107.8	22.8	79	1	1	4.77	500	35	NA	1.06212	15.7427	4.64723	21.6	12.8	28.2	1304	1500	876	18.15	11.2	48	11.8	0.56	7	2018	Literatures	Peng et al. (2019)
Planted	Broadleaved	107.8	22.8	79	1	14	18.2	901	32	NA	1.06212	15.7427	4.64723	21.6	12.8	28.2	1304	1500	876	2.8	6.8	43	11.2	0.89	1	2019	Literatures	Peng et al. (2019)
Planted	Broadleaved	107.8	22.8	79	1	6	13.63	500	35	NA	1.06212	15.7427	4.64723	21.6	12.8	28.2	1304	1500	876	84.3867	4.9	51	10.5	0.67	7	2018	Literatures	Peng et al. (2019)
Planted	Broadleaved	107.8	22.8	79	1	17	22.58	1750	32	NA	1.06212	15.7427	4.64723	21.6	12.8	28.2	1304	1500	876	43	6.8	44.7	9.2	0.32	1	2019	Literatures	Peng et al. (2019)
Planted	Broadleaved	107.8	22.8	79	1	6	16.4	500	37	NA	1.06212	15.7427	4.64723	21.6	12.8	28.2	1304	1500	876	33.95	7.3	45.2	13.8	0.43	7	2018	Literatures	Peng et al. (2019)
Planted	Broadleaved	107.8	22.8	79	1	19	18.2	1750	33	NA	1.06212	15.7427	4.64723	21.6	12.8	28.2	1304	1500	876	2.8	5.8	42.1	14.1	1.9	1	2019	Literatures	Peng et al. (2019)
Planted	Broadleaved	108.3	22.7	120	1	7	3.73	500	0	NA	1.11212	15.7397	4.59949	21.6	12.8	28	1280	1551.58	1394	120	14	37	27.63	0.98	8	2019	Literatures	Zhang et al. (2019)
Planted	Broadleaved	108.3	22.7	120	1	7	3.2	500	0	NA	1.11212	15.7397	4.59949	21.6	12.8	28	1280	1551.58	1394	100	13	39	15.9	1.75	8	2019	Literatures	Zhang et al. (2019)
Planted	Broadleaved	108.3	22.7	120	1	7	3.2	500	0	NA	1.11212	15.7397	4.59949	21.6	12.8	28	1280	1551.58	1394	90	13	39	22.34	1.16	8	2019	Literatures	Zhang et al. (2019)
Planted	Broadleaved	108.3	22.7	120	1	7	3.2	500	0	NA	1.11212	15.7397	4.59949	21.6	12.8	28	1280	1551.58	1394	15	12	58	17.2	0.96	8	2019	Literatures	Zhang et al. (2019)
Planted	Broadleaved	108.3	22.7	120	1	7	3.2	500	0	NA	1.11212	15.7397	4.59949	21.6	12.8	28	1280	1551.58	1394	15	11.1	59	10.2	0.4	8	2019	Literatures	Zhang et al. (2019)
Planted	Broadleaved	108.3	22.7	120	1	7	3.2	500	0	NA	1.11212	15.7397	4.59949	21.6	12.8	28	1280	1551.58	1394	14	10	57	15	0.43	8	2019	Literatures	Zhang et al. (2019)
Planted	Broadleaved	108.3	22.7	120	1	7	3.2	500	0	NA	1.11212	15.7397	4.59949	21.6	12.8	28	1280	1551.58	1394	60	20	27	26.78	1.41	8	2019	Literatures	Zhang et al. (2019)
Planted	Broadleaved	108.3	22.7	120	1	7	3.2	500	0	NA	1.11212	15.7397	4.59949	21.6	12.8	28	1280	1551.58	1394	65	17.5	28.1	15.9	1.18	8	2019	Literatures	Zhang et al. (2019)
Planted	Broadleaved	108.3	22.7	120	1	7	3.2	500	0	NA	1.11212	15.7397	4.59949	21.6	12.8	28	1280	1551.58	1394	71	18.1	27.6	15.9	1.12	8	2019	Literatures	Zhang et al. (2019)
Planted	Broadleaved	108.3	22.7	120	1	7	4.83	500	0	NA	1.11212	15.7397	4.59949	21.6	12.8	28	1280	1551.58	1394	47	14.2	48	22.34	0.9	8	2019	Literatures	Zhang et al. (2019)
Planted	Broadleaved	108.3	22.7	120	1	7	3.2	500	0	NA	1.11212	15.7397	4.59949	21.6	12.8	28	1280	1551.58	1394	61	15.1	46	22.34	0.9	8	2019	Literatures	Zhang et al. (2019)
Planted	Broadleaved	108.3	22.7	120	1	7	3.2	500	0	NA	1.11212	15.7397	4.59949	21.6	12.8	28	1280	1551.58	1394	50	14.6	45.1	19.5	0.85	8	2019	Literatures	Zhang et al. (2019)
Planted	Coniferous	122.344	53.4683	290	1	26	43.8	1267	15	NA	0.6	1.15714	5.89	-5.5	-28.9	13.5	430	2446.4	1287	10.02	12.69	43.5	11.1	1.12	5	2018	Literatures	Zhang et al. (2019)
Planted	Coniferous	122.344	53.4683	290	2	20	43.8	1267	5	NA	0.6	1.15714	5.89	-5.5	-28.9	13.5	430	2446.4	1287	9.68	11.9	17.33	11.6	0.37	9	2018	Literatures	Zhang et al. (2019)
Planted	Coniferous	122.344	53.4683	290	2	13	37.5	2000	6	NA	0.6	1.15714	5.89	-5.5	-28.9	13.5	430	2446.4	1287	5.56	12.1	14.73	8.626	0.29	9	2018	Literatures	Zhang et al. (2019)
Natural	Coniferous	106.9	21.8	426	3	75	18.2	876	35	SW	1.23747	15.7754	4.61358	21.8	8.2	28.9	1475	1300	765	3.001	27.2	21.2	NA	0.65	7	2013	Literatures	Zhang et al. (2019)
Natural	Coniferous	106.9	21.8	426	2	120	16.47	500	37	SW	1.23747	15.7754	4.61358	21.8	8.2	28.9	1475	1300	765	2.983	11.1	27.2	NA	0.61	5	2019	Literatures	Zhang et al. (2019)
Natural	Coniferous	109.1	23.05	378	2	200	16.47	500	33	SE	1.34455	15.3488	4.59817	21.5	7.8	28.2	1477.8	1300	725	24	8.6	27.6	NA	1.7	5	2019	Literatures	Zhang et al. (2019)
Natural	Coniferous	109.1	23.05	378	2	130	16.47	876	32	SE	1.34455	15.3488	4.59817	21.5	7.8	28.2	1477.8	1300	725	21	26.2	36.1	NA	1.05536	5	2019	Literatures	Zhang et al. (2019)
Natural	Coniferous	119.7	25.5	95.2	4	75	6.2	450	19.5	NA	2	3	5	19.4	11	28	1500	1919.7	1917.4	3.064	31.5	32.1	NA	0.6	7	2013	Literatures	Zhang et al. (2019)
Natural	Broadleaved	122.18	42.78	250	1	30	43.6	450	5	NA	2.45818	7.9843	6.03642	5.6	-8.6	20.9	450	2254.84	1770	3.166	12	32	NA	1.22981	7	2013	Literatures	Zhang et al. (2019)
Natural	Broadleaved	122.18	42.78	250	1	5	50.7	450	5	NA	2.45818	7.9843	6.03642	5.6	-11.5	19.8	450	2254.84	1917.4	3.158	15	35	NA	0.4	7	2013	Literatures	Zhang et al. (2019)
Natural	Broadleaved	122.18	42.78	250	1	20	50.7	450	5	NA	2.45818	7.9843	6.03642	5.6	-8.6	21.6	450	2254.84	2312	3.137	28	24	NA	1.3	7	2013	Literatures	Zhang et al. (2019)
Natural	Coniferous	101.83	29.6666	2850	2	120	7.9	1267	30	NA	2.63	6.74	6.5	8.5	4.1	16.7	1387	2100	1893	3.482	12.9	42.1	NA	0.41	5	2019	Literatures	Zhang et al. (2019)
Natural	Coniferous	108.66	35.3	1480	1	15	50.7	450	31	5	2.47341	9.59483	6.21447	7	-7	16.8	600	2199.82	1256	2	36.7	28.7	NA	0.4	8	2013	Literatures	Zhang et al. (2019)
Natural	Coniferous	103.4	36.03	1500	2	30	10	1867	0	NA	2.26	9.29761	6.70503	10.3	-2.3	23.2	327	2324.89	2589	6.2	10.1	23.8	NA	1.30132	5	2019	Literatures	Zhang et al. (2019)
Natural	Broadleaved	88.372	40.151	808.2	1	30	19.9	1600	30	NA	1.17612	8.42446	8.31135	10.7	-7.8	24.8	28.5	2739.53	2750	50	3.6	46.2	NA	1.58	7	2018	Literatures	Zhang et al. (2019)
Natural	Broadleaved	88.349	40.147	811.6	1	15	31.4	1267	35	NA	1.17734	8.42258	8.31281	10.7	-7.8	24.8	28.5	2739.9	2750	13	5.5	40	NA	2.575	7	2018	Literatures	Zhang et al. (2019)
Natural	Broadleaved	88.346	40.144	818.2	1	15	25.2	1267	30	NA	1.18182	8.41712	8.31308	10.7	-7.8	24.8	28.5	2740.14	2750	10.97	6.5	36.1	NA	1.8	7	2018	Literatures	Zhang et al. (2019)
Natural	Broadleaved	88.375	40.105	811.7	1	20	25.6	1267	41.5	NA	1.1774	8.43843	8.30566	10.7	-7.8	24.8	28.5	2737.51	2750	36.94	4.1	44.6	NA	2.1	7	2018	Literatures	Zhang et al. (2019)
Natural	Broadleaved	88.365	40.104	810.2	1	30	25.6	2000	41.5	NA	1.17582	8.44031	8.3062	10.7	-7.8	24.8	28.5	2737.56	2750	58.83	4.8	42.4	NA	2.5	7	2018	Literatures	Zhang et al. (2019)
Natural	Broadleaved	112.15	36.55	1563	3	NA	23.9	1267	24	NA	2.73513	9.03714	6.10937	6.2	-2.8	11.8	662	2202.36	1523	25.2	22	36.1	NA	1.3	7	2013	Literatures	Zhang et al. (2019)
Natural	Broadleaved	112.15	36.55	1563	3	NA	23.9	1267	24	NA	2.73513	9.03714	6.10937	6.2	-2.8	11.8	662	2202.36	1760	17.8	21.8	36.3	NA	1.4	7	2013	Literatures	Zhang et al. (2019)
Natural	Broadleaved	103.1	30.325	1800	2	15	14.79	2000	15	NA	2.27985	11.2919	5.83872	16.1	6.1	25.3	1732	2118.07	3911	22.59	12.25	49.59	NA	0.58	4	2013	Literatures	Zhang et al. (2019)
Natural	Broadleaved	103.1	30.325	1800	2	20	14.79	1267	4	NA	2.27985	11.2919	5.83872	16.1	6.1	25.3	1732	2118.07	3911	15.55	11.31	48.42	NA	0.88	4	2013	Literatures	Zhang et al. (2019)
Natural	Broadleaved	103.1	30.325	1800	3	15	14.79	1267	5	NA	2.27985	11.2919	5.83872	16.1	6.1	25.3	1732	2118.07	3911	25.83	11.82	45.63	NA	0.65	4	2013	Literatures	Zhang et al. (2019)
Natural	Broadleaved	103.1	30.325	1800	3	NA	14.79	1267	24	NA	2.27985	11.2919	5.83872	16.1	6.1	25.3	1732	2118.07	1893	53.13	14.75	36.23	NA	1.37512	4	2013	Literatures	Zhang et al. (2019)
Natural	Broadleaved	103.1	30.325	1800	3	NA	14.79	1267	30	NA	2.27985	11.2919	5.83872	16.1	6.1	25.3	1732	2118.07	1268	24.33	13.69	51.93	NA	2.04	4	2013	Literatures	Zhang et al. (2019)
Natural	Broadleaved	103.1	30.325	1800	1	NA	14.79	1600	15	NA	2.27985	11.2919	5.83872	16.1	6.1	25.3	1732	2118.07	3950	74.05	20.76	41.96	NA	0.32	4	2013	Literatures	Zhang et al. (2019)
Natural	Broadleaved	103.1	30.325	1800	1	37.5	14.79	1600	5	NA	2.27985	11.2919	5.83872	16.1	6.1	25.3	1732	2118.07	3950	36.11	23.49	36.89	NA	1.3	4	2013	Literatures	Zhang et al. (2019)
Natural	Broadleaved	103.1	30.325	1800	3	NA	14.79	1600	20	NA	2.27985	11.2919	5.83872	16.1	6.1	25.3	1732	2118.07	3950	50.9	23.97	30.67	NA	0.32	4	2013	Literatures	Zhang et al. (2019)
Natural	Broadleaved	103.1	30.325	1800	3	NA	14.79	1600	28	NA	2.27985	11.2919	5.83872	16.1	6.1	25.3	1732	2118.07	2086	15.52	11.57	39	NA	1.41	4	2013	Literatures	Zhang et al. (2019)
Natural	Broadleaved	103.1	30.325	1800	3	15	14.79	1267	5	NA	2.27985	11.2919	5.83872	16.1	6.1	25.3	1732	2118.07	3911	24.08	7.995	43.15	NA	0.65	4	2013	Literatures	Zhang et al. (2019)
Natural	Broadleaved	103.1	30.325	1800	1	15	17.1975	2000	4	NA	2.27985	11.2919	5.83872	16.1	6.1	25.3	1732	2118.07	3911	38	18	48	NA	0.58	4	2013	Literatures	Zhang et al. (2019)
Natural	Broadleaved	103.1	30.325	1800	1	40	10	1267	5	NA	2.27985	11.2919	5.83872	16.1	6.1	25.3	1732	2118.07	3911	60	16	48.5	NA	0.32	4	2013	Literatures	Zhang et al. (2019)
Natural	Broadleaved	103.1	30.325	1800	1	20	20.0637	2000	4	NA	2.27985	11.2919	5.83872	16.1	6.1	25.3	1732	2118.07	3911	41	16	43	NA	1.3	4	2013	Literatures	Zhang et al. (2019)
Natural	Broadleaved	103.1	30.325	1800	1	25	32.4841	1600	10	NA	2.27985	11.2919	5.83872	16.1	6.1	25.3	1732	2118.07	3911	52	18.5	43	NA	1.4	4	2013	Literatures	Zhang et al. (2019)
Natural	Broadleaved	103.1	30.325	1800	3	15	14.9682	1600	15	NA	2.27985	11.2919	5.83872	16.1	6.1	25.3	1732	2118.07	3950	38	14	49	NA	0.32	4	2013	Literatures	Zhang et al. (2019)
Natural	Broadleaved	110.67	30.2	598	1	21	38.6	450	25	NA	1.78798	12.4136	5.37653	12.8	4.8	19.5	1400	1883.93	1228	21	40	22.34	NA	0.32	7	2009	Literatures	Zhang et al. (2019)
Natural	Broadleaved	110.67	30.2	598	1	15	38.6	450	22	NA	1.78798	12.4136	5.37653	12.8	4.8	19.5	1400	1883.93	1228	14.94	12	27.6	NA	1.4	7	2009	Literatures	Zhang et al. (2019)
Natural	Broadleaved	110.67	30.2	598	1	20	43.6	450	20	NA	1.78798	12.4136	5.37653	12.8	4.8	19.5	1400	1883.93	1228	27.23	13	34.423	NA	0.88	7	2009	Literatures	Zhang et al. (2019)
Natural	Broadleaved	110.67	30.2	598	1	20	43.8	450	25	NA	1.78798	12.4136	5.37653	12.8	4.8	19.5	1400	1883.93	1228	29.88	12	21.3	NA	1.2	7	2009	Literatures	Zhang et al. (2019)
Natural	Broadleaved	110.67	30.2	598	1	15	43.8	450	18	NA	1.78798	12.4136	5.37653	12.8	4.8	19.5	1400	1883.93	1228	13.94	18	32.1	NA	1.2	7	2009	Literatures	Zhang et al. (2019)
Natural	Broadleaved	117.52	30.02	314	1	NA	39.6	450	32	S	1.90464	12.7659	4.81684	11.8	3.3	27.3	1973	1744.01	550	25.15	23.8	35.453	NA	1.525	7	2017	Literatures	Zhang et al. (2019)
Natural	Broadleaved	103.05	29.97	1040	1	20	10	2000	30	NA	1.73543	12.0589	5.95384	14	-0.2	26.5	1774.3	2025.86	1945.6	50.52	11.34	37	NA	1.48	7	2018	Literatures	Zhang et al. (2019)
Natural	Broadleaved	103.05	29.97	1040	1	30	20	1600	30	NA	1.73543	12.0589	5.95384	14	-0.2	26.5	1774.3	2025.86	1945.6	46.56	13.01	38.1	NA	1.44	7	2018	Literatures	Zhang et al. (2019)
Natural	Broadleaved	103.05	29.97	1040	1	30	30	1267	30	NA	1.73543	12.0589	5.95384	14	-0.2	26.5	1774.3	2025.86	1945.6	43.41	14.07	35	NA	1.46	7	2018	Literatures	Zhang et al. (2019)
Natural	Broadleaved	119.13	29.44	320	1	30	50.7	450	10	S	1.96804	12.9802	4.62337	16.9	4.9	28.1	1712	1689.74	1770	33.56	20.41	38.745	NA	1.4	7	2017	Literatures	Zhang et al. (2019)
Natural	Broadleaved	102.25	28.63	2200	1	NA	29.9	450	4	NA	2.48567	11.4078	5.92135	11.4	3.4	30.2	1095	2035.2	3950	36.11	7.35294	51.2	NA	1.5	7	2014	Literatures	Zhang et al. (2019)
Natural	Broadleaved	102.21	28.56	1870	1	49	14.79	450	30	NA	2.24618	11.7643	5.89512	15	0.8	17.5	960	2016.13	1234	19.8	5.8	51.2	NA	0.88	7	2014	Literatures	Zhang et al. (2019)
Natural	Broadleaved	102.26	27.83	1901	1	25	14.79	450	35	NA	2.24903	12.0106	5.80304	14.7	0.3	17.5	1027	1982.84	1894	36.2	6.5	47	NA	0.32	7	2014	Literatures	Zhang et al. (2019)
Natural	Broadleaved	102.1	27.43	1978	1	NA	10.828	450	41.5	NA	2.28454	12.0855	5.77055	14.1	6.6	26.6	1049	1970.82	1357.2	72.3	7.46269	55	NA	0.66	7	2014	Literatures	Zhang et al. (2019)
Natural	Broadleaved	114.23	27.25	304	1	20	43.6	450	23	S	1.65943	13.8278	4.72345	17.7	5.9	28.9	1553	1670.96	1770	24.97	21.6	34.423	NA	1.3	7	2017	Literatures	Zhang et al. (2019)
Natural	Broadleaved	102.02	26.97	1779	1	15	22.6115	450	30	NA	2.12508	12.4591	5.70733	16.8	1.6	20.3	1038	1940.83	1634	36.5	6	49	NA	0.66	7	2014	Literatures	Zhang et al. (2019)
Natural	Broadleaved	113.75	26.65	303	1	15	37.5	450	26	S	1.61817	14.0567	4.68565	17.9	5.9	29.2	1410	1651.2	1180	27.88	21.26	36.11	NA	1.05	7	2017	Literatures	Zhang et al. (2019)
Natural	Broadleaved	102.08	26.5	2090	1	NA	13.6943	450	30	NA	2.33595	12.3266	5.66411	13.8	4.8	29.8	1160	1933.48	1256	65.28	7.8125	67.8632	NA	1.31	7	2014	Literatures	Zhang et al. (2019)
Natural	Broadleaved	105.7	26.48	1389	4	20	50.7	450	27	W	2.00664	13.0352	5.34321	15.1	5.7	20.9	1390	1835.49	1876	11.7	16.66	39.6464	NA	1.4	7	2009	Literatures	Zhang et al. (2019)
Natural	Broadleaved	105.7	26.48	1436	8	40	29.9	450	30	N	2.04019	12.9882	5.34615	15.1	5.7	20.9	1390	1837.84	1876	18.33	15.07	56	NA	1.4	7	2009	Literatures	Zhang et al. (2019)
Natural	Broadleaved	106.69	26.38	1138	4	50	6.2	450	35	N	1.87146	13.3242	5.24007	16.2	4.8	27.5	1277	1801.33	1523	38.06	15.91	37.2	NA	0.419018	7	2019	Literatures	Zhang et al. (2019)
Natural	Broadleaved	114.38	26.35	299	1	15	35.7	450	25	S	1.63629	14.1746	4.60052	17.5	6.2	28.2	1421	1626.25	1256	26.75	28.65	32.662	NA	1.05536	7	2017	Literatures	Zhang et al. (2019)
Natural	Broadleaved	105.82	26.13	1294	6	NA	11.5	450	25	E	1.93415	13.2631	5.28491	16.2	4.8	27.5	1277	1812.39	1523	59.92	14.8	35.1	NA	1.1	7	2019	Literatures	Zhang et al. (2019)
Natural	Broadleaved	119.5	26	255	4	15	14.9682	450	5	NA	1.83719	14.3515	4.16606	19.3	2.5	29.7	1100	1520.06	2312	8.9	13.2	28.7	NA	0.6	6	2018	Literatures	Zhang et al. (2019)
Natural	Broadleaved	119.5	26	255	4	20	14.79	450	6	NA	1.83719	14.3515	4.16606	19.3	2.5	29.7	1100	1520.06	2312	34.1	14.3	35.2	NA	1.4	6	2018	Literatures	Zhang et al. (2019)
Natural	Broadleaved	119.5	26	255	4	25	14.79	450	5	NA	1.83719	14.3515	4.16606	19.3	2.5	29.7	1100	1520.06	2312	11.2	13.5	32.3	NA	1.4	6	2018	Literatures	Zhang et al. (2019)
Natural	Broadleaved	119.5	26	255	4	NA	13.34	450	4	NA	1.83719	14.3515	4.16606	19.3	2.5	29.7	1100	1520.06	2312	72.3	13.3	33.1	NA	0.6	6	2018	Literatures	Zhang et al. (2019)
Natural	Broadleaved	101.97	25.64	2054	1	NA	14.79	450	30	NA	2.27954	12.6892	5.56391	15.6	1.4	18.7	925	1893.54	1245	37	4.9	52	NA	0.88	7	2014	Literatures	Zhang et al. (2019)
Natural	Broadleaved	101.09	25.62	2700	1	NA	13.34	450	30	NA	2.69829	12.0508	5.66855	12.1	-1.5	17.3	1035	1939.98	1934	33	4.8	51	NA	1.2	7	2014	Literatures	Zhang et al. (2019)
Natural	Broadleaved	102.4	25.53	2250	1	NA	14.79	450	25	NA	2.43655	12.535	5.52993	12.1	4.2	26.4	1008.6	1890.85	2086	22.6	8.33333	34	NA	0.579317	7	2014	Literatures	Zhang et al. (2019)
Natural	Broadleaved	101.42	25.31	2324	1	NA	14.79	450	41.5	NA	2.43639	12.5445	5.58171	14.2	0.5	17.8	986	1901.1	1635	38	5	43.5	NA	1.4	7	2014	Literatures	Zhang et al. (2019)
Natural	Broadleaved	113.54	25.14	684	1	15	24.3	450	32	N	1.83537	14.2491	4.53874	19.7	3.8	26.6	1665	1603.58	1200	32.87	23.86	34.551	NA	0.6	7	2017	Literatures	Zhang et al. (2019)
Natural	Broadleaved	110.46	25.1	193	1	15	38.6	450	19	NA	1.33776	14.7553	4.73681	18.5	8	28	1856.7	1629.92	1458.4	28.9	33.7	32	NA	0.65	7	2017	Literatures	Zhang et al. (2019)
Natural	Broadleaved	110.46	25.1	193	1	5	29.9	450	22	NA	1.33776	14.7553	4.73681	18.5	8	28	1856.7	1629.92	1458.4	25	35	35.453	NA	1.2	7	2017	Literatures	Zhang et al. (2019)
Natural	Broadleaved	102.6	24.93	2150	1	NA	35.6688	450	30	NA	2.35687	12.8628	5.43435	13.1	6.9	27.8	1035.3	1854.5	1256	50.9	8.13008	34.2	NA	0.971703	7	2014	Literatures	Zhang et al. (2019)
Natural	Broadleaved	110.51	24.91	300	8	15	34.2	450	9	NA	1.41087	14.7204	4.71622	18.9	7.8	28	1949.5	1625.58	1700	28.374	16.51	32.3	NA	1.2	7	2017	Literatures	Zhang et al. (2019)
Natural	Broadleaved	99.58	24.83	1980	1	15	7.9	450	30	NA	2.08943	13.0708	5.6405	15	1	19.5	1051	1893.08	1834	40	7.3	47	NA	0.6	7	2014	Literatures	Zhang et al. (2019)
Natural	Broadleaved	110.367	24.8083	300	3	49	32.2	450	18	NA	1.40105	14.759	4.71453	19	8	28	1900	1623.3	1458.4	90.24	20.3	35.453	NA	1.2	5	2012	Literatures	Zhang et al. (2019)
Natural	Broadleaved	103.333	24.8	1950	19	NA	13.34	450	32	NA	2.24502	13.1122	5.35018	16.2	8.2	32.4	967.9	1825.9	2086	23.69	7.043	41	NA	1.37	8	2018	Literatures	Yu et al. (2019)
Natural	Broadleaved	103.333	24.8	1950	19	NA	14.79	450	27	NA	2.24502	13.1122	5.35018	16.2	8.2	32.4	967.9	1825.9	2086	47.3	7.61	47	NA	1.53	8	2018	Literatures	Yu et al. (2019)
Natural	Broadleaved	103.333	24.8	1950	19	NA	11.5	450	28	NA	2.24502	13.1122	5.35018	16.2	8.2	32.4	967.9	1825.9	2086	6.62	10.177	52	NA	1.68203	8	2018	Literatures	Yu et al. (2019)
Natural	Broadleaved	103.333	24.8	1950	19	NA	11.5	450	30	NA	2.24502	13.1122	5.35018	16.2	8.2	32.4	967.9	1825.9	2086	20.62	11.107	37	NA	1.37	8	2018	Literatures	Yu et al. (2019)
Natural	Broadleaved	103.333	24.8	1950	19	NA	6.2	450	28	NA	2.24502	13.1122	5.35018	16.2	8.2	32.4	967.9	1825.9	2086	16.83	9.854	34	NA	1.37	8	2018	Literatures	Yu et al. (2019)
Natural	Broadleaved	103.333	24.8	1950	19	NA	11.5	450	24	NA	2.24502	13.1122	5.35018	16.2	8.2	32.4	967.9	1825.9	2086	29.07	4.668	44	NA	2.57791	8	2018	Literatures	Yu et al. (2019)
Natural	Broadleaved	103.333	24.8	1950	19	NA	11.5	450	25	NA	2.24502	13.1122	5.35018	16.2	8.2	32.4	967.9	1825.9	2086	24.65	10.044	47	NA	2.57791	8	2018	Literatures	Yu et al. (2019)
Natural	Broadleaved	103.333	24.8	1950	19	NA	6.2	450	28	NA	2.24502	13.1122	5.35018	16.2	8.2	32.4	967.9	1825.9	2086	21.78	4.816	51	NA	1.68203	8	2018	Literatures	Yu et al. (2019)
Natural	Broadleaved	103.333	24.8	1950	19	NA	11.5	450	23	NA	2.24502	13.1122	5.35018	16.2	8.2	32.4	967.9	1825.9	2086	4.66	8.896	52	NA	2.2	8	2018	Literatures	Yu et al. (2019)
Natural	Broadleaved	103.333	24.8	1950	19	NA	6.2	450	30	NA	2.24502	13.1122	5.35018	16.2	8.2	32.4	967.9	1825.9	2086	86.65	9.571	50	NA	1.05	8	2018	Literatures	Yu et al. (2019)
Natural	Broadleaved	103.333	24.8	1950	19	NA	6.2	450	30	NA	2.24502	13.1122	5.35018	16.2	8.2	32.4	967.9	1825.9	2086	8.65	9.34	66	NA	1.31	8	2018	Literatures	Yu et al. (2019)
Natural	Broadleaved	103.333	24.8	1950	19	NA	14.79	450	32	NA	2.24502	13.1122	5.35018	16.2	8.2	32.4	967.9	1825.9	2086	38.52	9.307	46	NA	1.48	8	2018	Literatures	Yu et al. (2019)
Natural	Broadleaved	103.333	24.8	1950	19	NA	14.79	450	30	NA	2.24502	13.1122	5.35018	16.2	8.2	32.4	967.9	1825.9	2086	55.95	7.437	55	NA	1.525	8	2018	Literatures	Yu et al. (2019)
Natural	Broadleaved	103.333	24.8	1950	19	NA	13.34	450	26	NA	2.24502	13.1122	5.35018	16.2	8.2	32.4	967.9	1825.9	2086	28.52	9.02	44	NA	2.57791	8	2018	Literatures	Yu et al. (2019)
Natural	Broadleaved	103.333	24.8	1950	19	NA	11.5	450	30	NA	2.24502	13.1122	5.35018	16.2	8.2	32.4	967.9	1825.9	2086	58.83	10.137	45	NA	1.76	8	2018	Literatures	Yu et al. (2019)
Natural	Broadleaved	103.333	24.8	1950	19	NA	13.34	450	24	NA	2.24502	13.1122	5.35018	16.2	8.2	32.4	967.9	1825.9	2086	70.64	9.242	56	NA	1.44	8	2018	Literatures	Yu et al. (2019)
Natural	Broadleaved	103.333	24.8	1950	19	NA	6.2	450	23	NA	2.24502	13.1122	5.35018	16.2	8.2	32.4	967.9	1825.9	2086	25.83	12.881	36	NA	1.48	8	2018	Literatures	Yu et al. (2019)
Natural	Broadleaved	103.333	24.8	1950	19	NA	13.34	450	32	NA	2.24502	13.1122	5.35018	16.2	8.2	32.4	967.9	1825.9	2086	73.1	13.724	41	NA	1.76633	8	2018	Literatures	Yu et al. (2019)
Natural	Broadleaved	103.333	24.8	1950	19	NA	14.79	450	31	NA	2.24502	13.1122	5.35018	16.2	8.2	32.4	967.9	1825.9	2086	7.4	9.682	47	NA	1.44	8	2018	Literatures	Yu et al. (2019)
Natural	Broadleaved	103.333	24.8	1950	19	NA	6.2	450	30	NA	2.24502	13.1122	5.35018	16.2	8.2	32.4	967.9	1825.9	2086	25.57	10.37	42	NA	1.46	8	2018	Literatures	Yu et al. (2019)
Natural	Broadleaved	113	24.5	441	1	30	61.4	450	4	NA	1.61737	14.7351	4.48543	20.7	8.7	27.1	1900	1570.89	1478	31.49	20.2	33.165	NA	0.65	7	2017	Literatures	Yu et al. (2019)
Natural	Broadleaved	106.394	24.488	1850	23	NA	11.5	450	30	WS	0.84	12	3.43	13.7	4.7	20.7	1657.2	1540.4	578.2	17.03	9.454	39	NA	0.54	8	2017	Literatures	Liang et al. (2018)
Natural	Broadleaved	106.394	24.488	1850	23	NA	11.5	450	30	WS	0.84	12	3.43	13.7	4.7	20.7	1657.2	1540.4	578.2	30.41	13.69	33	NA	0.54	8	2017	Literatures	Liang et al. (2018)
Natural	Broadleaved	106.394	24.488	1850	23	NA	11.5	450	35	WS	0.84	12	3.43	13.7	4.7	20.7	1657.2	1540.4	578.2	19.9	12.9	41	NA	1.67	8	2017	Literatures	Liang et al. (2018)
Natural	Broadleaved	106.394	24.488	1850	23	70	11.5	450	30	WS	0.84	12	3.43	13.7	4.7	20.7	1657.2	1540.4	578.2	66.11	14.56	42	NA	0.54	8	2017	Literatures	Liang et al. (2018)
Natural	Broadleaved	106.394	24.488	1850	23	NA	11.5	450	30	WS	0.84	12	3.43	13.7	4.7	20.7	1657.2	1540.4	578.2	21.32	9.83	37	NA	0.66	8	2017	Literatures	Liang et al. (2018)
Natural	Broadleaved	106.394	24.488	1850	23	NA	11.5	450	30	WS	0.84	12	3.43	13.7	4.7	20.7	1657.2	1540.4	578.2	106.07	13.39	29.1	NA	0.4	8	2017	Literatures	Liang et al. (2018)
Natural	Broadleaved	106.394	24.488	1850	23	NA	14.79	450	30	WS	0.84	12	3.43	13.7	4.7	20.7	1657.2	1540.4	578.2	45.54	8.778	47.3	NA	0.58	8	2017	Literatures	Liang et al. (2018)
Natural	Broadleaved	106.394	24.488	1850	23	NA	11.5	450	35	WS	0.84	12	3.43	13.7	4.7	20.7	1657.2	1540.4	578.2	34.58	16.932	26.4	NA	1.9	8	2017	Literatures	Liang et al. (2018)
Natural	Broadleaved	106.394	24.488	1850	23	30	6.2	450	30	WS	0.84	12	3.43	13.7	4.7	20.7	1657.2	1540.4	578.2	52.07	17.673	4.12	NA	1.73235	8	2017	Literatures	Liang et al. (2018)
Natural	Broadleaved	106.394	24.488	1850	23	70	6.2	450	30	WS	0.84	12	3.43	13.7	4.7	20.7	1657.2	1540.4	578.2	50.06	15.48	24.5	NA	1.9543	8	2017	Literatures	Liang et al. (2018)
Natural	Broadleaved	106.394	24.488	1850	23	59	14.79	450	30	WS	0.84	12	3.43	13.7	4.7	20.7	1657.2	1540.4	578.2	22.4	12.708	37.3	NA	1.9543	8	2017	Literatures	Liang et al. (2018)
Natural	Broadleaved	106.394	24.488	1850	23	NA	6.2	450	30	WS	0.84	12	3.43	13.7	4.7	20.7	1657.2	1540.4	578.2	25.34	8.933	41.3	NA	0.48	8	2017	Literatures	Liang et al. (2018)
Natural	Broadleaved	106.394	24.488	1850	23	NA	13.34	450	30	WS	0.84	12	3.43	13.7	4.7	20.7	1657.2	1540.4	578.2	12.7	8.658	38.2	NA	0.54	8	2017	Literatures	Liang et al. (2018)
Natural	Broadleaved	106.394	24.488	1850	23	NA	11.5	450	30	WS	0.84	12	3.43	13.7	4.7	20.7	1657.2	1540.4	578.2	15.76	10.35	32.1	NA	0.66	8	2017	Literatures	Liang et al. (2018)
Natural	Broadleaved	106.394	24.488	1850	23	NA	13.34	450	30	WS	0.84	12	3.43	13.7	4.7	20.7	1657.2	1540.4	578.2	21.45	7.585	39.2	NA	1.22981	8	2017	Literatures	Liang et al. (2018)
Natural	Broadleaved	106.394	24.488	1850	23	70	6.2	450	30	WS	0.84	12	3.43	13.7	4.7	20.7	1657.2	1540.4	578.2	37.36	14.15	32.5	NA	1.22981	8	2017	Literatures	Liang et al. (2018)
Natural	Broadleaved	106.394	24.488	1850	23	30	11.5	450	41.5	WS	0.84	12	3.43	13.7	4.7	20.7	1657.2	1540.4	578.2	20.38	13.396	38.1	NA	0.54	8	2017	Literatures	Liang et al. (2018)
Natural	Broadleaved	106.394	24.488	1850	23	NA	14.79	450	35	WS	0.84	12	3.43	13.7	4.7	20.7	1657.2	1540.4	578.2	11.47	9.112	34.2	NA	1.9	8	2017	Literatures	Liang et al. (2018)
Natural	Broadleaved	106.394	24.488	1850	23	NA	11.5	450	30	WS	0.84	12	3.43	13.7	4.7	20.7	1657.2	1540.4	578.2	34.73	22.5	34.4	NA	0.66	8	2017	Literatures	Liang et al. (2018)
Natural	Broadleaved	106.394	24.488	1850	23	NA	13.34	450	41.5	WS	0.84	12	3.43	13.7	4.7	20.7	1657.2	1540.4	578.2	22.42	7.402	46.4	NA	0.58	8	2017	Literatures	Liang et al. (2018)
Natural	Broadleaved	106.394	24.488	1850	23	NA	13.34	450	35	WS	0.84	12	3.43	13.7	4.7	20.7	1657.2	1540.4	578.2	15.58	10.2	51.2	NA	1.7	8	2017	Literatures	Liang et al. (2018)
Natural	Broadleaved	106.394	24.488	1850	23	NA	13.34	450	30	WS	0.84	12	3.43	13.7	4.7	20.7	1657.2	1540.4	578.2	35.97	12.05	40.2	NA	2.2	8	2017	Literatures	Liang et al. (2018)
Natural	Broadleaved	106.394	24.488	1850	23	NA	13.34	450	30	WS	0.84	12	3.43	13.7	4.7	20.7	1657.2	1540.4	578.2	17.03	9.454	39	NA	0.66	8	2017	Literatures	Liang et al. (2018)
Natural	Broadleaved	106.395	24.484	1750	43	NA	6.2	450	30	WS	0.86	16	3.4	14.3	5.1	20.9	1721	1540.4	567	16.26	9.048	41.1	NA	0.54	8	2017	Literatures	Liang et al. (2018)
Natural	Broadleaved	106.395	24.484	1750	43	37.5	11.5	450	30	WS	0.86	16	3.4	14.3	5.1	20.9	1721	1540.4	567	10.39	11.18	25.7	NA	0.41	8	2017	Literatures	Liang et al. (2018)
Natural	Broadleaved	106.395	24.484	1750	43	NA	13.34	450	30	WS	0.86	16	3.4	14.3	5.1	20.9	1721	1540.4	567	18.97	15.69	37.4	NA	0.966846	8	2017	Literatures	Liang et al. (2018)
Natural	Broadleaved	106.395	24.484	1750	43	NA	11.5	450	30	WS	0.86	16	3.4	14.3	5.1	20.9	1721	1540.4	567	16.11	13.038	44.2	NA	0.54	8	2017	Literatures	Liang et al. (2018)
Natural	Broadleaved	106.395	24.484	1750	43	NA	13.34	450	30	WS	0.86	16	3.4	14.3	5.1	20.9	1721	1540.4	567	17.87	13.25	37.3	NA	1.25	8	2017	Literatures	Liang et al. (2018)
Natural	Broadleaved	106.395	24.484	1750	43	NA	14.79	450	30	WS	0.86	16	3.4	14.3	5.1	20.9	1721	1540.4	567	88.65	10.002	46.5	NA	1.80664	8	2017	Literatures	Liang et al. (2018)
Natural	Broadleaved	106.395	24.484	1750	43	35	13.34	450	30	WS	0.86	16	3.4	14.3	5.1	20.9	1721	1540.4	567	16.36	11.105	36.2	NA	1.04959	8	2017	Literatures	Liang et al. (2018)
Natural	Broadleaved	106.395	24.484	1750	43	51	13.34	450	30	WS	0.86	16	3.4	14.3	5.1	20.9	1721	1540.4	567	18.1	16.98	36.3	NA	1.53552	8	2017	Literatures	Liang et al. (2018)
Natural	Broadleaved	106.395	24.484	1750	43	NA	14.79	450	41.5	WS	0.86	16	3.4	14.3	5.1	20.9	1721	1540.4	567	36.34	16.23	34.4	NA	1.3	8	2017	Literatures	Liang et al. (2018)
Natural	Broadleaved	106.395	24.484	1750	43	10	13.34	450	30	WS	0.86	16	3.4	14.3	5.1	20.9	1721	1540.4	567	18.51	13.33	35	NA	1.76	8	2017	Literatures	Liang et al. (2018)
Natural	Broadleaved	106.395	24.484	1750	43	NA	11.5	450	30	WS	0.86	16	3.4	14.3	5.1	20.9	1721	1540.4	567	59.4	16.19	30.4	NA	1.41	8	2017	Literatures	Liang et al. (2018)
Natural	Broadleaved	106.395	24.484	1750	43	21	14.79	450	35	WS	0.86	16	3.4	14.3	5.1	20.9	1721	1540.4	567	29.54	11.503	53.4	NA	1.38	8	2017	Literatures	Liang et al. (2018)
Natural	Broadleaved	106.395	24.484	1750	43	NA	14.79	450	35	WS	0.86	16	3.4	14.3	5.1	20.9	1721	1540.4	567	47.69	7.379	46.1	NA	0.419018	8	2017	Literatures	Liang et al. (2018)
Natural	Broadleaved	106.395	24.484	1750	43	25	14.79	450	41.5	WS	0.86	16	3.4	14.3	5.1	20.9	1721	1540.4	567	17.26	8.3	49.6	NA	1.38	8	2017	Literatures	Liang et al. (2018)
Natural	Broadleaved	106.395	24.484	1750	43	NA	14.79	450	41.5	WS	0.86	16	3.4	14.3	5.1	20.9	1721	1540.4	567	44.52	24.8	21.3	NA	1.95528	8	2017	Literatures	Liang et al. (2018)
Natural	Broadleaved	106.395	24.484	1750	43	50	13.34	450	41.5	WS	0.86	16	3.4	14.3	5.1	20.9	1721	1540.4	567	29.34	9.824	44	NA	1.42	8	2017	Literatures	Liang et al. (2018)
Natural	Broadleaved	106.395	24.484	1750	43	NA	13.34	450	41.5	WS	0.86	16	3.4	14.3	5.1	20.9	1721	1540.4	567	26.15	23.98	27.5	NA	2.4	8	2017	Literatures	Liang et al. (2018)
Natural	Broadleaved	106.395	24.484	1750	43	NA	11.5	450	30	WS	0.86	16	3.4	14.3	5.1	20.9	1721	1540.4	567	26.81	15.22	33.3	NA	1.81543	8	2017	Literatures	Liang et al. (2018)
Natural	Broadleaved	106.395	24.484	1750	43	32.5	11.5	450	30	WS	0.86	16	3.4	14.3	5.1	20.9	1721	1540.4	567	27.28	11.86	37.9	NA	1.86	8	2017	Literatures	Liang et al. (2018)
Natural	Broadleaved	106.395	24.484	1750	43	21	13.34	450	30	WS	0.86	16	3.4	14.3	5.1	20.9	1721	1540.4	567	20.78	9.055	36.3	NA	1.04669	8	2017	Literatures	Liang et al. (2018)
Natural	Broadleaved	106.395	24.484	1750	43	25	11.5	450	35	WS	0.86	16	3.4	14.3	5.1	20.9	1721	1540.4	567	18.45	11.05	32.3	NA	2.04	8	2017	Literatures	Liang et al. (2018)
Natural	Broadleaved	106.395	24.484	1750	43	50	11.5	450	30	WS	0.86	16	3.4	14.3	5.1	20.9	1721	1540.4	567	25.32	22.99	44.2	NA	1.37512	8	2017	Literatures	Liang et al. (2018)
Natural	Broadleaved	106.395	24.484	1750	43	10	14.79	450	30	WS	0.86	16	3.4	14.3	5.1	20.9	1721	1540.4	567	24.39	8.963	41.2	NA	1.26	8	2017	Literatures	Liang et al. (2018)
Natural	Broadleaved	106.395	24.484	1750	43	49	6.2	450	30	WS	0.86	16	3.4	14.3	5.1	20.9	1721	1540.4	567	30.46	12.93	52.2	NA	0.419018	8	2017	Literatures	Liang et al. (2018)
Natural	Broadleaved	106.395	24.484	1750	43	NA	14.79	450	41.5	WS	0.86	16	3.4	14.3	5.1	20.9	1721	1540.4	567	68.38	20.56	36.2	NA	1.81543	8	2017	Literatures	Liang et al. (2018)
Natural	Broadleaved	106.395	24.484	1750	43	35	6.2	450	30	WS	0.86	16	3.4	14.3	5.1	20.9	1721	1540.4	567	24.03	15.097	36.2	NA	1.52	8	2017	Literatures	Liang et al. (2018)
Natural	Broadleaved	106.395	24.484	1750	43	70	13.34	450	30	WS	0.86	16	3.4	14.3	5.1	20.9	1721	1540.4	567	90.24	18.76	48.5	NA	1.71876	8	2017	Literatures	Liang et al. (2018)
Natural	Broadleaved	106.395	24.484	1750	43	30	13.34	450	30	WS	0.86	16	3.4	14.3	5.1	20.9	1721	1540.4	567	44.06	18.06	34.3	NA	1.92	8	2017	Literatures	Liang et al. (2018)
Natural	Broadleaved	106.395	24.484	1750	43	NA	6.2	450	30	WS	0.86	16	3.4	14.3	5.1	20.9	1721	1540.4	567	33.35	25.54	32.1	NA	0.971703	8	2017	Literatures	Liang et al. (2018)
Natural	Broadleaved	106.395	24.484	1750	43	37	14.79	450	30	WS	0.86	16	3.4	14.3	5.1	20.9	1721	1540.4	567	13.39	13.22	43.9	NA	1.79471	8	2017	Literatures	Liang et al. (2018)
Natural	Broadleaved	106.395	24.484	1750	43	NA	11.5	450	30	WS	0.86	16	3.4	14.3	5.1	20.9	1721	1540.4	567	33.06	16.506	28.2	NA	2.70145	8	2017	Literatures	Liang et al. (2018)
Natural	Broadleaved	106.395	24.484	1750	43	42	11.5	450	35	WS	0.86	16	3.4	14.3	5.1	20.9	1721	1540.4	567	25.91	25.59	30.5	NA	1.52	8	2017	Literatures	Liang et al. (2018)
Natural	Broadleaved	106.395	24.484	1750	43	NA	6.2	450	35	WS	0.86	16	3.4	14.3	5.1	20.9	1721	1540.4	567	27.83	9.721	45.1	NA	1.55	8	2017	Literatures	Liang et al. (2018)
Natural	Broadleaved	106.395	24.484	1750	43	35	6.2	450	30	WS	0.86	16	3.4	14.3	5.1	20.9	1721	1540.4	567	23.57	8.017	41.2	NA	1.60328	8	2017	Literatures	Liang et al. (2018)
Natural	Broadleaved	106.395	24.484	1750	43	35	14.79	450	30	WS	0.86	16	3.4	14.3	5.1	20.9	1721	1540.4	567	20.74	15.794	35.2	NA	0.66	8	2017	Literatures	Liang et al. (2018)
Natural	Broadleaved	106.395	24.484	1750	43	37	11.5	450	41.5	WS	0.86	16	3.4	14.3	5.1	20.9	1721	1540.4	567	27.73	16.1	33.1	NA	2	8	2017	Literatures	Liang et al. (2018)
Natural	Broadleaved	106.395	24.484	1750	43	35	6.2	450	41.5	WS	0.86	16	3.4	14.3	5.1	20.9	1721	1540.4	567	14.94	12.2	52.3	NA	0.97	8	2017	Literatures	Liang et al. (2018)
Natural	Broadleaved	106.395	24.484	1750	43	NA	11.5	450	41.5	WS	0.86	16	3.4	14.3	5.1	20.9	1721	1540.4	567	65.6	15.77	42.5	NA	1.3504	8	2017	Literatures	Liang et al. (2018)
Natural	Broadleaved	106.395	24.484	1750	43	21	13.34	450	30	WS	0.86	16	3.4	14.3	5.1	20.9	1721	1540.4	567	29.17	10.32	47.3	NA	2.57791	8	2017	Literatures	Liang et al. (2018)
Natural	Broadleaved	106.395	24.484	1750	43	NA	6.2	450	35	WS	0.86	16	3.4	14.3	5.1	20.9	1721	1540.4	567	39.17	11.99	42.1	NA	0.579317	8	2017	Literatures	Liang et al. (2018)
Natural	Broadleaved	106.395	24.484	1750	43	25	11.5	450	30	WS	0.86	16	3.4	14.3	5.1	20.9	1721	1540.4	567	13.28	12.15	43.2	NA	1.31	8	2017	Literatures	Liang et al. (2018)
Natural	Broadleaved	106.395	24.484	1750	43	NA	11.5	450	30	WS	0.86	16	3.4	14.3	5.1	20.9	1721	1540.4	567	15.28	19.45	40.2	NA	1.76	8	2017	Literatures	Liang et al. (2018)
Natural	Broadleaved	106.395	24.484	1750	43	35	11.5	450	41.5	WS	0.86	16	3.4	14.3	5.1	20.9	1721	1540.4	567	14.73	10.509	52.1	NA	1.47732	8	2017	Literatures	Liang et al. (2018)
Natural	Broadleaved	106.358	24.445	1350	30	30	14.79	450	30	WN	0.92	21	3.35	16.2	5.8	21.6	1756	1540.4	550	19.38	13.2	36.1	NA	1.7	8	2017	Literatures	Liang et al. (2018)
Natural	Broadleaved	106.358	24.445	1350	30	5	11.5	450	41.5	WN	0.92	21	3.35	16.2	5.8	21.6	1756	1540.4	550	45.87	14.203	38.3	NA	1.12018	8	2017	Literatures	Liang et al. (2018)
Natural	Broadleaved	106.358	24.445	1350	30	20	11.5	450	41.5	WN	0.92	21	3.35	16.2	5.8	21.6	1756	1540.4	550	22.4	12.287	35.1	NA	2.72428	8	2017	Literatures	Liang et al. (2018)
Natural	Broadleaved	106.358	24.445	1350	30	15	13.34	450	30	WN	0.92	21	3.35	16.2	5.8	21.6	1756	1540.4	550	32.98	10.843	45.3	NA	2.72428	8	2017	Literatures	Liang et al. (2018)
Natural	Broadleaved	106.358	24.445	1350	30	20	6.2	450	30	WN	0.92	21	3.35	16.2	5.8	21.6	1756	1540.4	550	11.16	16.38	40.3	NA	2.70145	8	2017	Literatures	Liang et al. (2018)
Natural	Broadleaved	106.358	24.445	1350	30	20	6.2	450	30	WN	0.92	21	3.35	16.2	5.8	21.6	1756	1540.4	550	36.87	11.18	32.1	NA	2.55066	8	2017	Literatures	Liang et al. (2018)
Natural	Broadleaved	106.358	24.445	1350	30	45	14.79	450	30	WN	0.92	21	3.35	16.2	5.8	21.6	1756	1540.4	550	95.27	9.952	46.2	NA	1.604	8	2017	Literatures	Liang et al. (2018)
Natural	Broadleaved	106.358	24.445	1350	30	5	6.2	450	30	WN	0.92	21	3.35	16.2	5.8	21.6	1756	1540.4	550	42.3	21.908	29.2	NA	1.82	8	2017	Literatures	Liang et al. (2018)
Natural	Broadleaved	106.358	24.445	1350	30	5	13.34	450	30	WN	0.92	21	3.35	16.2	5.8	21.6	1756	1540.4	550	8.6	16.203	29.2	NA	1.44	8	2017	Literatures	Liang et al. (2018)
Natural	Broadleaved	106.358	24.445	1350	30	25	11.5	450	41.5	WN	0.92	21	3.35	16.2	5.8	21.6	1756	1540.4	550	65.28	22.99	32.2	NA	1.46638	8	2017	Literatures	Liang et al. (2018)
Natural	Broadleaved	106.358	24.445	1350	30	30	11.5	450	35	WN	0.92	21	3.35	16.2	5.8	21.6	1756	1540.4	550	22.33	12.45	42.1	NA	1.05	8	2017	Literatures	Liang et al. (2018)
Natural	Broadleaved	106.358	24.445	1350	30	20	13.34	450	35	WN	0.92	21	3.35	16.2	5.8	21.6	1756	1540.4	550	36.5	21.43	35.4	NA	1.18678	8	2017	Literatures	Liang et al. (2018)
Natural	Broadleaved	106.358	24.445	1350	30	15	14.79	450	41.5	WN	0.92	21	3.35	16.2	5.8	21.6	1756	1540.4	550	15.39	27.89	29.2	NA	0.805031	8	2017	Literatures	Liang et al. (2018)
Natural	Broadleaved	106.358	24.445	1350	30	5	11.5	450	30	WN	0.92	21	3.35	16.2	5.8	21.6	1756	1540.4	550	23.4	12.94	45	NA	1.79471	8	2017	Literatures	Liang et al. (2018)
Natural	Broadleaved	106.358	24.445	1350	30	15	11.5	450	30	WN	0.92	21	3.35	16.2	5.8	21.6	1756	1540.4	550	49.9	29.22	43.1	NA	0.911529	8	2017	Literatures	Liang et al. (2018)
Natural	Broadleaved	106.358	24.445	1350	30	15	14.79	450	30	WN	0.92	21	3.35	16.2	5.8	21.6	1756	1540.4	550	5.94	16.89	39.2	NA	1.60328	8	2017	Literatures	Liang et al. (2018)
Natural	Broadleaved	106.358	24.445	1350	30	20	13.34	450	30	WN	0.92	21	3.35	16.2	5.8	21.6	1756	1540.4	550	38.76	12.34	35.2	NA	0.805031	8	2017	Literatures	Liang et al. (2018)
Natural	Broadleaved	106.358	24.445	1350	30	25	13.34	450	30	WN	0.92	21	3.35	16.2	5.8	21.6	1756	1540.4	550	57.51	19.08	38.1	NA	1.2468	8	2017	Literatures	Liang et al. (2018)
Natural	Broadleaved	106.358	24.445	1350	30	30	11.5	450	30	WN	0.92	21	3.35	16.2	5.8	21.6	1756	1540.4	550	36.94	16.04	38.3	NA	3.02732	8	2017	Literatures	Liang et al. (2018)
Natural	Broadleaved	106.358	24.445	1350	30	32.5	11.5	450	30	WN	0.92	21	3.35	16.2	5.8	21.6	1756	1540.4	550	74.04	25.07	37.3	NA	1.42	8	2017	Literatures	Liang et al. (2018)
Natural	Broadleaved	106.358	24.445	1350	30	15	13.34	450	35	WN	0.92	21	3.35	16.2	5.8	21.6	1756	1540.4	550	27.52	23.096	37.1	NA	3.07756	8	2017	Literatures	Liang et al. (2018)
Natural	Broadleaved	106.358	24.445	1350	30	20	11.5	450	30	WN	0.92	21	3.35	16.2	5.8	21.6	1756	1540.4	550	26.3	15.14	33.2	NA	1.52	8	2017	Literatures	Liang et al. (2018)
Natural	Broadleaved	106.358	24.445	1350	30	15	14.79	450	41.5	WN	0.92	21	3.35	16.2	5.8	21.6	1756	1540.4	550	8.99	14.18	36.2	NA	1.79471	8	2017	Literatures	Liang et al. (2018)
Natural	Broadleaved	106.358	24.445	1350	30	15	13.34	450	30	WN	0.92	21	3.35	16.2	5.8	21.6	1756	1540.4	550	17.04	13.55	43.3	NA	0.845221	8	2017	Literatures	Liang et al. (2018)
Natural	Broadleaved	106.358	24.445	1350	30	15	14.79	450	35	WN	0.92	21	3.35	16.2	5.8	21.6	1756	1540.4	550	31.72	3.31	15.53	NA	2	8	2017	Literatures	Liang et al. (2018)
Natural	Broadleaved	106.358	24.445	1350	30	5	11.5	450	30	WN	0.92	21	3.35	16.2	5.8	21.6	1756	1540.4	550	7.36	18.76	35.2	NA	1.82	8	2017	Literatures	Liang et al. (2018)
Natural	Broadleaved	106.358	24.445	1350	30	30	14.79	450	35	WN	0.92	21	3.35	16.2	5.8	21.6	1756	1540.4	550	38	26.019	16	NA	0.982961	8	2017	Literatures	Liang et al. (2018)
Natural	Broadleaved	106.358	24.445	1350	30	20	11.5	450	35	WN	0.92	21	3.35	16.2	5.8	21.6	1756	1540.4	550	21.58	16.905	43.1	NA	3.02732	8	2017	Literatures	Liang et al. (2018)
Natural	Broadleaved	106.358	24.445	1350	30	20	14.79	450	30	WN	0.92	21	3.35	16.2	5.8	21.6	1756	1540.4	550	6.26	16.33	42.1	NA	1.36	8	2017	Literatures	Liang et al. (2018)
Natural	Broadleaved	106.379	24.405	1450	26	15	11.5	450	30	WS	0.9	19	3.38	15.6	5.5	21.3	1734	1540.4	560	11.27	12.016	37.4	NA	2.21311	8	2017	Literatures	Liang et al. (2018)
Natural	Broadleaved	106.379	24.405	1450	26	30	6.2	450	35	WS	0.9	19	3.38	15.6	5.5	21.3	1734	1540.4	560	10.12	12.67	41.3	NA	1.53552	8	2017	Literatures	Liang et al. (2018)
Natural	Broadleaved	106.379	24.405	1450	26	37.5	14.79	450	30	WS	0.9	19	3.38	15.6	5.5	21.3	1734	1540.4	560	43.12	14.566	29.5	NA	1.5	8	2017	Literatures	Liang et al. (2018)
Natural	Broadleaved	106.379	24.405	1450	26	25	14.79	450	30	WS	0.9	19	3.38	15.6	5.5	21.3	1734	1540.4	560	23.79	21.9	37.1	NA	3.02732	8	2017	Literatures	Liang et al. (2018)
Natural	Broadleaved	106.379	24.405	1450	26	30	6.2	450	30	WS	0.9	19	3.38	15.6	5.5	21.3	1734	1540.4	560	10.97	15.317	30.3	NA	1.42	8	2017	Literatures	Liang et al. (2018)
Natural	Broadleaved	106.379	24.405	1450	26	37.5	13.34	450	30	WS	0.9	19	3.38	15.6	5.5	21.3	1734	1540.4	560	68.84	21.537	31.2	NA	2.2	8	2017	Literatures	Liang et al. (2018)
Natural	Broadleaved	106.379	24.405	1450	26	5	14.79	450	35	WS	0.9	19	3.38	15.6	5.5	21.3	1734	1540.4	560	30.94	11.909	48.2	NA	0.73	8	2017	Literatures	Liang et al. (2018)
Natural	Broadleaved	106.379	24.405	1450	26	20	13.34	450	35	WS	0.9	19	3.38	15.6	5.5	21.3	1734	1540.4	560	23.97	10.884	41.4	NA	1.58	8	2017	Literatures	Liang et al. (2018)
Natural	Broadleaved	106.379	24.405	1450	26	20	11.5	450	30	WS	0.9	19	3.38	15.6	5.5	21.3	1734	1540.4	560	20.2	15.094	36.4	NA	2	8	2017	Literatures	Liang et al. (2018)
Natural	Broadleaved	106.379	24.405	1450	26	5	14.79	450	30	WS	0.9	19	3.38	15.6	5.5	21.3	1734	1540.4	560	16.55	8.876	45.5	NA	1.83291	8	2017	Literatures	Liang et al. (2018)
Natural	Broadleaved	106.379	24.405	1450	26	15	13.34	450	35	WS	0.9	19	3.38	15.6	5.5	21.3	1734	1540.4	560	28.39	12.43	46.2	NA	1.76159	8	2017	Literatures	Liang et al. (2018)
Natural	Broadleaved	106.379	24.405	1450	26	37.5	6.2	450	35	WS	0.9	19	3.38	15.6	5.5	21.3	1734	1540.4	560	39.02	20.37	35.2	NA	0.53	8	2017	Literatures	Liang et al. (2018)
Natural	Broadleaved	106.379	24.405	1450	26	30	13.34	450	30	WS	0.9	19	3.38	15.6	5.5	21.3	1734	1540.4	560	15.57	12.054	33.7	NA	1.9	8	2017	Literatures	Liang et al. (2018)
Natural	Broadleaved	106.379	24.405	1450	26	NA	14.79	450	35	WS	0.9	19	3.38	15.6	5.5	21.3	1734	1540.4	560	62.5	8.255	45.3	NA	1.4	8	2017	Literatures	Liang et al. (2018)
Natural	Broadleaved	106.379	24.405	1450	26	15	14.79	450	30	WS	0.9	19	3.38	15.6	5.5	21.3	1734	1540.4	560	8.78	13.85	38.1	NA	2	8	2017	Literatures	Liang et al. (2018)
Natural	Broadleaved	106.379	24.405	1450	26	25	6.2	450	30	WS	0.9	19	3.38	15.6	5.5	21.3	1734	1540.4	560	23.27	9.967	45.2	NA	1.05536	8	2017	Literatures	Liang et al. (2018)
Natural	Broadleaved	106.379	24.405	1450	26	20	14.79	450	30	WS	0.9	19	3.38	15.6	5.5	21.3	1734	1540.4	560	30.57	22.88	35.2	NA	2.90619	8	2017	Literatures	Liang et al. (2018)
Natural	Broadleaved	106.379	24.405	1450	26	20	11.5	450	30	WS	0.9	19	3.38	15.6	5.5	21.3	1734	1540.4	560	13.27	24.28	30.3	NA	1.58	8	2017	Literatures	Liang et al. (2018)
Natural	Broadleaved	106.379	24.405	1450	26	40	6.2	450	35	WS	0.9	19	3.38	15.6	5.5	21.3	1734	1540.4	560	31.81	23.68	36.2	NA	1.6	8	2017	Literatures	Liang et al. (2018)
Natural	Broadleaved	106.379	24.405	1450	26	37.5	11.5	450	30	WS	0.9	19	3.38	15.6	5.5	21.3	1734	1540.4	560	54.1	7.663	45.2	NA	0.873253	8	2017	Literatures	Liang et al. (2018)
Natural	Broadleaved	106.379	24.405	1450	26	15	11.5	450	30	WS	0.9	19	3.38	15.6	5.5	21.3	1734	1540.4	560	25.14	13.36	37.3	NA	1.72	8	2017	Literatures	Liang et al. (2018)
Natural	Broadleaved	106.379	24.405	1450	26	20	6.2	450	30	WS	0.9	19	3.38	15.6	5.5	21.3	1734	1540.4	560	36.07	28.65	30.4	NA	1.72	8	2017	Literatures	Liang et al. (2018)
Natural	Broadleaved	106.379	24.405	1450	26	15	6.2	450	35	WS	0.9	19	3.38	15.6	5.5	21.3	1734	1540.4	560	15.93	9.022	46.1	NA	1.72	8	2017	Literatures	Liang et al. (2018)
Natural	Broadleaved	106.379	24.405	1450	26	15	13.34	450	30	WS	0.9	19	3.38	15.6	5.5	21.3	1734	1540.4	560	31.9	8.851	42.1	NA	1.72	8	2017	Literatures	Liang et al. (2018)
Natural	Broadleaved	106.379	24.405	1450	26	5	11.5	450	30	WS	0.9	19	3.38	15.6	5.5	21.3	1734	1540.4	560	20.2	10.55	43.1	NA	1.7	8	2017	Literatures	Liang et al. (2018)
Natural	Broadleaved	106.379	24.405	1450	26	15	11.5	450	35	WS	0.9	19	3.38	15.6	5.5	21.3	1734	1540.4	560	13.94	12.44	47.1	NA	1.3	8	2017	Literatures	Liang et al. (2018)
Natural	Broadleaved	99.11	24.27	800	1	15	35.7	450	41.5	NA	1.20838	14.4635	5.53326	20.1	5.4	22.3	1361	1816.07	1874	50	7.2	43	NA	0.88	7	2014	Literatures	Liang et al. (2018)
Natural	Broadleaved	102.35	24.21	1730	1	42	14.79	450	30	NA	2.02392	13.5563	5.3381	18.4	5.4	20.6	956	1804.28	1345	30	7.2	49	NA	0.88	7	2014	Literatures	Liang et al. (2018)
Natural	Broadleaved	101.85	24.17	1950	1	30	19.7452	450	10	NA	2.15605	13.3514	5.38483	14.7	8	30.8	952.7	1821.98	3911	35.23	8.69565	41.96	NA	0.65	7	2014	Literatures	Liang et al. (2018)
Natural	Broadleaved	111.74	24.14	412	1	20	43.8	450	32	S	1.52627	14.9008	4.53472	19.6	6.8	27.4	1972	1574.27	1200	28.9	27.92	32.081	NA	1.4	7	2017	Literatures	Liang et al. (2018)
Natural	Broadleaved	110.93	24.12	471	1	30	38.6	450	35	N	1.52939	14.8494	4.59739	20.4	10.1	27.9	1743	1590.16	1256	34.12	27.01	32.381	NA	0.68	7	2017	Literatures	Liang et al. (2018)
Natural	Broadleaved	101.85	24.11	1962	1	NA	14.79	450	30	NA	2.16283	13.3622	5.37816	16.7	3.6	19.8	1078	1819.79	1784	63.795	8.653	47	NA	1.4	7	2014	Literatures	Liang et al. (2018)
Natural	Broadleaved	102.75	24.1	2000	1	NA	14.79	450	5	NA	2.23231	13.328	5.31102	14.4	7.9	31	870.3	1805.81	3911	88.09	8.77193	52.3	NA	0.88	7	2014	Literatures	Liang et al. (2018)
Natural	Broadleaved	103.79	23.4	1949	1	55	7.9	450	10	NA	2.22446	13.6448	5.14241	9	3.2	15.6	1291	1752.86	2034	38	6.5	52	NA	1.2	7	2014	Literatures	Liang et al. (2018)
Natural	Broadleaved	103.53	23.17	1400	1	NA	30.4	450	30	NA	1.81349	14.2812	5.09942	16.4	9.1	32.5	1621.4	1719.16	1917.4	12.7	9.80392	34	NA	1.31	7	2014	Literatures	Liang et al. (2018)
